1 Targeted reduction of highly abundant  
2 transcripts with *pseudo-random* primers

3 Ophélie Arnaud<sup>1</sup>, Sachi Kato<sup>1</sup>, Stéphane Poulain<sup>1</sup>, Charles Plessey<sup>1</sup>

4 1. RIKEN Center for Life Science Technologies, Division of Genomic  
5 Technologies, Yokohama, Kanagawa, 230-0045 Japan

6 Corresponding authors: Charles Plessey: RIKEN Center for Life Science Technologies,  
7 Division of Genomic Technologies, Yokohama, Kanagawa, 230-0045 Japan;  
8 [plessey@riken.jp](mailto:plessey@riken.jp)

9 Keywords: nanoCAGE; high-throughput sequencing; ribosomal RNA; undesirable  
10 sequences

11 Abstract word count: 158 words

12 Manuscript word count: 1752 words

13

## 14 **Abstract**

15 Transcriptome studies based on quantitative sequencing estimate gene expression  
16 levels by measuring the abundance of target RNAs in libraries of sequence reads. The  
17 sequencing cost is proportional to the total number of sequenced reads. Therefore, in  
18 order to cover rare RNAs, considerable quantities of abundant and identical reads  
19 have to be sequenced. This major limitation can be lifted by strategies used to deplete  
20 the library from some of the most abundant sequences. However, these strategies  
21 involve either an extra handling of the input RNA sample, or the use of a large  
22 number of reverse-transcription primers (termed “not-so-random primers”), which are  
23 costly to synthesize and customize. Here, we demonstrate that with a precise selection  
24 of only 40 “pseudo-random” reverse-transcription primers, it is possible to decrease  
25 the rate of undesirable abundant sequences within a library without affecting the  
26 transcriptome diversity. “Pseudo-random” primers are simple to design, and therefore  
27 are a flexible tool for enriching transcriptome libraries in rare transcripts sequences.

## 28 **Methods summary**

29 The precise selection and the use of pseudo-random primers allows for reducing the  
30 detection of undesirable sequences within libraries and so increase the effective depth  
31 of the sequencing. Our study also concludes that, instead of the 4096 random primers  
32 currently used, only 40 pseudo-random primers are enough.

## 33 **Introduction**

34 In transcriptome studies using quantitative sequencing, highly abundant sequences  
35 within a library limit the coverage and increase the difficulty to detect transcripts of

36 interest. For example, ribosomal RNAs (rRNA) can represent the majority of a  
37 sequence library, which means that most of the money spent on sequencing would be  
38 for reads that are irrelevant in the downstream analysis. For this reason, transcriptome  
39 analysis methods often include a step for removing rRNA.

40 At present, several methods exist to deplete rRNA, for example, by priming the  
41 cDNAs or enriching the mRNAs with poly-T oligonucleotides, by capturing and  
42 removing the rRNAs with hybridization probes and magnetic beads (Ribo-Zero kit  
43 (1) or antibodies directed against DNA:RNA hybrids (GeneReadrRNA depletion kit  
44 (2), by capturing first-strand cDNAs synthesized from capped transcripts (CAP  
45 Trapper) (3), by selectively degrading the 5'-phosphate RNAs ("Terminator" enzyme)  
46 (Epicentre), or by biasing the reverse-transcription primers against the rRNA  
47 sequences (4).

48 In this last method, termed "not-so-random primers" (NSR), the cDNAs are primed  
49 with a mixture of the 749 out of 4096 random hexamers that do not have a direct  
50 match with the human ribosomal RNAs, leading to a reduction of these sequences  
51 from 78% to 13% (4). The major drawback of this method is that the pool of primers  
52 is prepared by synthesizing each primer individually, which makes customization  
53 costly when adding a linker tail or changing the target for depletion (for instance  
54 hemoglobin) (5).

55 Here, we present a dramatic simplification of the not-so-random primers concept,  
56 which we term "pseudo-random primers" (PS). Following the initial observation of  
57 Mizuno et al. (1999) that the reverse-transcriptase tolerates even two mismatches at  
58 the priming site (6), we reasoned that a large number of not-so-random primer  
59 sequences are functionally redundant and that it would be possible to dramatically  
60 reduce their number, thus facilitating the development and testing of custom sets.

## 61 **Materials and methods**

### 62 **Selection of PS primers**

63 The 40 PS primers were selected to bind neither to the human rRNA nor to the linker  
64 sequence of the template-switching oligonucleotide used in our experiments (See  
65 supplemental information 1).

66 The 40 primers were individually synthesized (Invitrogen) with standard desalting  
67 purification grade, resuspended at 100  $\mu$ M in ultra-pure water and mixed equimolarly.

### 68 **Selection of PS\_Hb primers**

69 The 33 PS\_Hb primers were selected as described in supplemental material 1, by  
70 discarding hexamers sequences targeting human  $\alpha$ -globin RNA and human  $\beta$ -globin  
71 RNA.

### 72 **Library preparation**

73 NanoCAGE libraries were prepared according to Salimullah *et al.*, 2011 using 50 ng  
74 of total RNA extracted from HeLa and THP-1 cells lines (7). Technical triplicates of  
75 each nanoCAGE library were prepared from each RNA sample. Four libraries were  
76 made, to compare 1) Random hexamers (RanN6) versus PS primers, 2) RanN6, PS  
77 and 40 randomly picked RanN6 (40N6) primers, 3) RanN6, PS, 3 subsets of 20 PS  
78 and 1 subset of 10 PS primers, and 4) RanN6 versus PS\_Hb primers. Thus,  
79 differences between RanN6 and PS primers, depleting rRNA and artifacts, were  
80 replicated in three independent experiments. Details of each nanoCAGE library are  
81 available in supplementary table 1.

## 82 Data processing and analysis

83 The prepared libraries were individually paired-end sequenced on a MiSeq sequencer  
84 (Illumina) using the standard nanoCAGE sequencing primers (7). The sequencing  
85 data were analyzed using the workflow manager Moirai (8). Briefly, the reads were  
86 demultiplexed and trimmed to 15 bases with FASTX-Toolkit  
87 ([http://hannonlab.cshl.edu/fastx\\_toolkit/](http://hannonlab.cshl.edu/fastx_toolkit/)). Then, the reads coming from rRNA or  
88 oligo-artifacts were removed with TagDust (version 1.13) (9) and the remaining reads  
89 were aligned to the human genome (hg19) with BWA (version 0.7) (10). Then, the  
90 non-proper paired reads and the PCR duplicates were filtered out with samtools  
91 (version 0.1.19) (11). Finally, the properly paired reads were clustered and analyzed  
92 as in Harbers *et al.*, 2013 (12) (the scripts used for the analysis are provided in  
93 supplemental materials 2).

## 94 Results and discussion

95 We tested the pseudo-random primers concept using the nanoCAGE method for  
96 transcriptome profiling (13). In this method, 5' adapters are introduced by template-  
97 switching oligonucleotides during the reverse transcription, where random primers are  
98 used to cover the non-polyadenylated transcriptome. Thus, the undesirable sequences  
99 in nanoCAGE libraries come mostly from 2 sources: the ribosomal RNA and primers-  
100 primers artifacts. The rate of these undesired sequences becomes especially  
101 problematic when the quantity of starting material is lower than a nanogram. We  
102 therefore designed pseudo-random primers to reduce rRNA and primer-primers  
103 artifacts at the same time. Using scripts written in the R language (see Supplemental  
104 Information 1), we identified 40 hexamers that do not fully match with the human  
105 rRNA reference sequences, and do not show similarities up to 2 mismatches with the

106 nanoCAGE linker sequence. We prepared a mixture of 40 reverse-transcription  
107 primers containing these hexamers (PS), to replace the standard reverse-transcription  
108 random primers (RanN6).

109 We tested the PS primers on three sets of triplicated libraries prepared from HeLa and  
110 THP-1 cell line total RNA. Using nanoCAGE libraries prepared with RanN6 primers  
111 as a control (Figure S1), we observed a significant decrease in reads matching to  
112 ribosomal RNA (Fig 1A). Primer artifacts were also reduced (Figure 1B), but the  
113 difference was only statistically significant for the THP-1 libraries: for one HeLa set  
114 of triplicates, there was no diminution, but the overall amount of artifacts was  
115 uniformly low, making it difficult to see any effect of the PS primers. To exclude the  
116 possibility that the observed effect of the PS primers comes only from the reduction of  
117 the hexamer diversity regardless of our selection, we included a control using 40  
118 randomly picked hexamers (40N6). These libraries did not significantly deplete rRNA  
119 reads, but had an impact on primer artifacts. We explain this effect by the fact that  
120 only a few hexamers match to the linker sequences of the nanoCAGE primers, and  
121 therefore the 40N6 set was depleted by chance. Indeed, only 32% of them match the  
122 linkers with no or 1 mismatch (Figure S2). This confirms the efficiency of our precise  
123 selection of the PS primers to decrease the detection of the undesired sequences  
124 within nanoCAGE libraries.

125 We then verified that the two-fold reduction of the number of different hexamers did  
126 not impair genes detection. After normalizing the libraries to the same number of  
127 aligned reads (supplemental material 2), we detected between 3348 and 4235 genes  
128 per replicate (supplemental table 1). Not only the number of genes detected was not  
129 reduced with the use of only 40 primers, but also we detected significantly more

130 genes with the PS primers than with the RanN6 primers, in both cell lines tested  
131 (Figure 2A). One simple explanation could be that PS primers that don't bind to the  
132 ribosomal RNA are free to bind transcripts of interest, which would increase the  
133 likelihood of less abundant RNAs reverse-transcription. This is corroborated by the  
134 observation that libraries using the 40N6 primers, not selected against rRNA, do not  
135 allow for higher gene detection rate in comparison with the RanN6 primers.  
136 Importantly, because we normalized the number of aligned reads after filtering out the  
137 ones aligning on the rRNA, the effect of the PS primers can not be explained by the  
138 higher coverage at an equal number of raw reads. Altogether, our results show that the  
139 libraries prepared with PS primers cover more genes than the libraries prepared with  
140 RanN6 primers.

141 To investigate the reliability of the expression values measured in PS-primed libraries,  
142 we compared our experiments pairwise after averaging the triplicates (supplemental  
143 material 2). Samples prepared from the same RNAs correlated better than samples  
144 prepared with the same RT primers set, but the correlation coefficients still suggested  
145 important differences induced by the change of primers (Fig 2B). Indeed, inspection  
146 of the pairwise plots shows that the most highly expressed genes deviate strongly  
147 from the diagonal when comparing the PS and RanN6 primers on the same RNA (Fig  
148 2B). Given that the PS primers are strongly selected, this was expectable, and we  
149 reasoned that the bias should be systematic. To demonstrate that fact, we compared  
150 the fold change of expression levels between HeLa and THP-1 RNA in each set of  
151 primers, and showed that they were conserved (Fig 2C). Thus, libraries made with PS  
152 primers can be compared with libraries made with other RT primers by looking at fold  
153 changes with a common reference, like in transcriptome platform comparisons (14).

154 According to the good transcriptome coverage obtained with only 40 PS primers, we  
155 next wondered how many PS primers are required to conserve the same transcriptome  
156 diversity? The original number of 40 was set empirically from the matches on rRNA  
157 and nanoCAGE linkers, but the lower limit is unknown. We therefore prepared  
158 libraries with subsets of 20 or 10 PS primers (supplemental table 2). A similar number  
159 of genes (around 4000 genes per sample, supplemental table 1) could be detected in  
160 the libraries. We also observed a systematic bias in these libraries, but because they  
161 were made with subsets of the original PS primers, they all had a stronger similarity  
162 with each other than with RanN6 libraries (Fig 3). Thus, it appears possible to prepare  
163 whole-transcriptome libraries with as few as 10 pseudo-random primers.

164 Finally, we sought to demonstrate that the PS primers concept could be applied on  
165 other targets than the rRNAs. In total RNA extracted from blood, up to 60% of the  
166 transcripts come from hemoglobin genes, (15). Hence, we have selected 33 PS  
167 primers (PS\_Hb) that did not match on hemoglobin sequences (with 2 or more  
168 mismatches) (supplemental material 1) and prepared nanoCAGE libraries with either  
169 these primers or standard RanN6 primers. The selection drastically reduced the  
170 number of tag per hemoglobin genes (Fig 4A), without reducing the number of  
171 detected genes (Fig 4B), thus demonstrating the possibility of designing PS primers  
172 against other targets.

173 In conclusion, despite several methods already exists to eliminate the sequences  
174 coming from ribosomal RNA in transcriptome studies, lots of them require an extra  
175 step in the protocol. Moreover, none of them is also able to eliminate, in a single step,  
176 multiple unrelated undesirable sequences. Here, we report that in transcriptome  
177 studies a drastic selection of the primers used during the reverse transcription is



178 effective for eliminating specific sequences without reducing gene coverage.  
179 Moreover, our data supports the idea that the number of PS primers required is low,  
180 leading to a real cost-saving effect in the experiments. Finally, while tested here with  
181 the nanoCAGE protocol, this strategy is not limited to it and should be applicable to  
182 any kind of transcriptome studies.

## 183 **Authors contributions**

184 CP conceived the project; OA, SK and CP designed the experiments; OA, SK and SP  
185 performed the experiments; OA and CP analyzed the data, OA and CP wrote the  
186 manuscript. All authors read and approved the final manuscript.

## 187 **Acknowledgements**

188 The authors would like to thank Michiel de Hoon for the suggestion about using a  
189 subset of the pseudo-random primers; Roberto Simone who has suggested the name  
190 *pseudo-random primers* and Alistair Forrest and Yuri Ishizu for the gift of the human  
191 blood RNA sample.

192 This work was supported by a Research Grant from the Japanese Ministry of  
193 Education, Culture, Sports, Science and Technology (MEXT) to the RIKEN Center  
194 for Life Science Technologies, a Grant-in-Aid for Young Scientists A (number  
195 25710018) and a research grant from the Mitsubishi Foundation (number 25142).

## 196 **Competing Interests statement**

197 The authors declare no competing financial interests.

## 198 **References**

- 199 1- Roy Sooknanan, John Hitchen, A. R. (2012). Superior rRNA Removal for RNA-Seq Library  
200 Preparation. *Journal of Biomolecular Technique*, 23, S57–58.
- 201 2- O’Neil, D., Glowatz, H., & Schlumpberge, M. (2013). Ribosomal RNA depletion for efficient  
202 use of RNA-seq capacity. *Current Protocols in Molecular Biology*, (SUPPL.103), 1–8.  
203 doi:10.1002/0471142727.mb0419s103

- 204 3- Carninci, P., Kvam, C., Kitamura, a, Ohsumi, T., Okazaki, Y., Itoh, M., ... Schneider, C.  
205 (1996). High-efficiency full-length cDNA cloning by biotinylated CAP trapper. *Genomics*,  
206 37(3), 327–336. doi:10.1006/geno.1996.0567
- 207 4- Armour, C. D., Castle, J. C., Chen, R., Babak, T., Loerch, P., Jackson, S., ... Raymond, C. K.  
208 (2009). Digital transcriptome profiling using selective hexamer priming for cDNA synthesis.  
209 *Nature Methods*, 6(9), 647–9. doi:10.1038/nmeth.1360
- 210 5- Vignali, M., Armour, C. D., Chen, J., Morrison, R., Castle, J. C., Biery, M. C., ... Duffy, P. E.  
211 (2011). Technical advance NSR-seq transcriptional profiling enables identification of a gene  
212 signature of *Plasmodium falciparum* parasites infecting children, *I21*(3), 1119–1129.  
213 doi:10.1172/JCI43457DS1
- 214 6- Mizuno, Y., Carninci, P., Okazaki, Y., Tateno, M., Kawai, J., Amanuma, H., ... Hayashizaki,  
215 Y. (1999). Increased specificity of reverse transcription priming by trehalose and oligo-  
216 blockers allows high-efficiency window separation of mRNA display. *Nucleic Acids*  
217 *Research*, 27(5), 1345–1349. doi:10.1093/nar/27.5.1345
- 218 7- Salimullah, M., Mizuho, S., Plessy, C., & Carninci, P. (n.d.). NanoCAGE: A High-Resolution  
219 Technique to Discover and Interrogate Cell Transcriptomes Protocol NanoCAGE: A High-  
220 Resolution Technique to Discover and Interrogate Cell Transcriptomes.  
221 doi:10.1101/pdb.prot5559
- 222 8- Hasegawa, A., Daub, C., Carninci, P., Hayashizaki, Y., & Lassmann, T. (2014). MOIRAI: a  
223 compact workflow system for CAGE analysis. *BMC Bioinformatics*, 15, 144.  
224 doi:10.1186/1471-2105-15-144
- 225 9- Lassmann, T., Hayashizaki, Y., & Daub, C. O. (2009). TagDust - A program to eliminate  
226 artifacts from next generation sequencing data. *Bioinformatics*, 25(21), 2839–2840.  
227 doi:10.1093/bioinformatics/btp527
- 228 10- Li, H., & Durbin, R. (2010). Fast and accurate long-read alignment with Burrows-Wheeler  
229 transform. *Bioinformatics*, 26(5), 589–595. doi:10.1093/bioinformatics/btp698
- 230 11- Li, H., Handsaker, B., Wysoker, A., Fennell, T., Ruan, J., Homer, N., ... Durbin, R. (2009).  
231 The Sequence Alignment/Map format and SAMtools. *Bioinformatics*, 25(16), 2078–2079.  
232 doi:10.1093/bioinformatics/btp352
- 233 12- Harbers, M., Kato, S., de Hoon, M., Hayashizaki, Y., Carninci, P., & Plessy, C. (2013).  
234 Comparison of RNA- or LNA-hybrid oligonucleotides in template-switching reactions for  
235 high-speed sequencing library preparation. *BMC Genomics*, 14(1), 665. doi:10.1186/1471-  
236 2164-14-665

- 237 13- Plessy, C., Bertin, N., Takahashi, H., Simone, R., Lassmann, T., Vitezic, M., ... Gustincich, S.  
238 (2011). NIH Public Access, 7(7), 528–534. doi:10.1038/nmeth.1470.Linking
- 239 14- Kawaji, H., Lizio, M., Itoh, M., Kanamori-Katayama, M., Kaiho, A., Nishiyori-Sueki, H., ...  
240 Carninci, P. (2014). Comparison of CAGE and RNA-seq transcriptome profiling using  
241 clonally amplified and single-molecule next-generation sequencing. *Genome Research*, 24(4),  
242 708–717. doi:10.1101/gr.156232.113
- 243 15- Mele, M., Ferreira, P. G., Reverter, F., DeLuca, D. S., Monlong, J., Sammeth, M., ... Guigo,  
244 R. (2015). The human transcriptome across tissues and individuals. *Science*, 348(6235), 660–  
245 665. doi:10.1126/science.aaa0355

## 246 **Figures**

### 247 **Figure 1: Depletion of ribosomal sequences and artifacts**

248 Rate of ribosomal RNA (A) and artifacts (B) detected with the 40N6, PS or RanN6  
249 primers sets. Each point corresponds to the mean of 3 technical replicates in the same  
250 experiment. Statistical test: t.test paired between the mean of PS and RanN6 data sets,  
251 non-paired with the raw value of 40N6 data set. \* P-value<0.05; \*\* p-value<0.01; \*\*\*  
252 p-value<0.001.

### 253 **Figure 2: Coverage of transcriptome diversity**

254 A. Percentage of genes detected with the 40N6 and PS primers compared to the  
255 RanN6 primers, set arbitrarily to 100 % in HeLa and THP-1 respectively. Each point  
256 corresponds to the mean of 3 technical replicates in the same experiment. The data  
257 were normalized by sub-sampling to 8700 tags per sample. Statistical test: t.test paired  
258 between the mean of RanN6 and PS data sets, non-paired with the raw value of 40N6  
259 data set. \* P-value<0.05; \*\* p-value<0.01; \*\*\* p-value<0.001

260 B. Pairwise comparison between the PS and RanN6 libraries from the 2 cell lines.  
261 Each plot is the mean of 3 experiments with 3 technical replicates. Upper part:

262 expression plots where the reads are aligned to the reference gene model. Lower part:  
263 Pearson correlation of each pair.  
264 C. HeLa-THP1 fold change in gene expression.

### 265 **Figure 3: Transcriptome coverage with small number of primers**

266 Hierarchical clustering of the detected genes (after normalization to 8700 tags per  
267 sample). The red value is the Approximately Unbiased (AU) p-value and the green  
268 value is the Bootstrap Probability (BP) value. The red box represent the cluster  
269 significantly established (AU p-value<0.05). All the samples were prepared in the  
270 same experiment (library NC\_17).

### 271 **Figure 4: Targeted depletion of hemoglobin sequences**

272 A. Measured expression levels (in counts per million) of hemoglobin genes with the  
273 PS\_Hb and the RanN6 primers. Each bar represents a technical replicates of one  
274 experiment.

275 B. Number of genes detected with the use of PS\_Hb versus RanN6 primers. Each  
276 point corresponds to a technical replicate of the same experiment. The data were  
277 normalized to 3190 tags per sample.

### 278 **Supplemental material:**

- 279 • Supplemental material 1: scripts and programs used for the primers  
280 selection
- 281 • Supplemental material 2: Scripts and programs used in the data  
282 analysis:

- 283 Link 1: general commands creating the files used in downstream analysis
- 284 Link 2: analysis of the first experiment, NCms10058
- 285 Link 3: analysis of the second experiment, NC12
- 286 Link 4: analysis of the third experiment, NC17
- 287 Link 5: common analysis of the three experiments
- 288 Link 6: Statistical analysis
- 289 Link 7: analysis of the fourth experiment regarding the RNA extracted from
- 290 blood, NC22
- 291 • Supplemental material 3: Figure S2: Reads genomic features
- 292 Percentage of reads aligned to each feature of the genome (promoter, exon, intron,
- 293 intergenique section, rDNA) and the artifacts. Each row is the average of the technical
- 294 triplicates of the same library.
- 295 • Supplemental material 4: Figure S1: Maximal distance of the 40N6
- 296 primers with the template-switching primer
- 297 Number of mismatches between the hexamers of the 40N6 primers and the template
- 298 switching primers.
- 299 • Supplemental material 5: Table S1: Summary table
- 300 Extensive summary for each sample tested. It includes the experiment name, the
- 301 origin of the RNA, the barcode and index added, the primer set used and the
- 302 sequencing results.
- 303 • Supplemental material 6: Table S2: sequences of the 20 PS and 10

304 PS primers sets.  
305 Pseudo-random primers sequences composing the different sets of pseudo-random  
306 tested.

1A

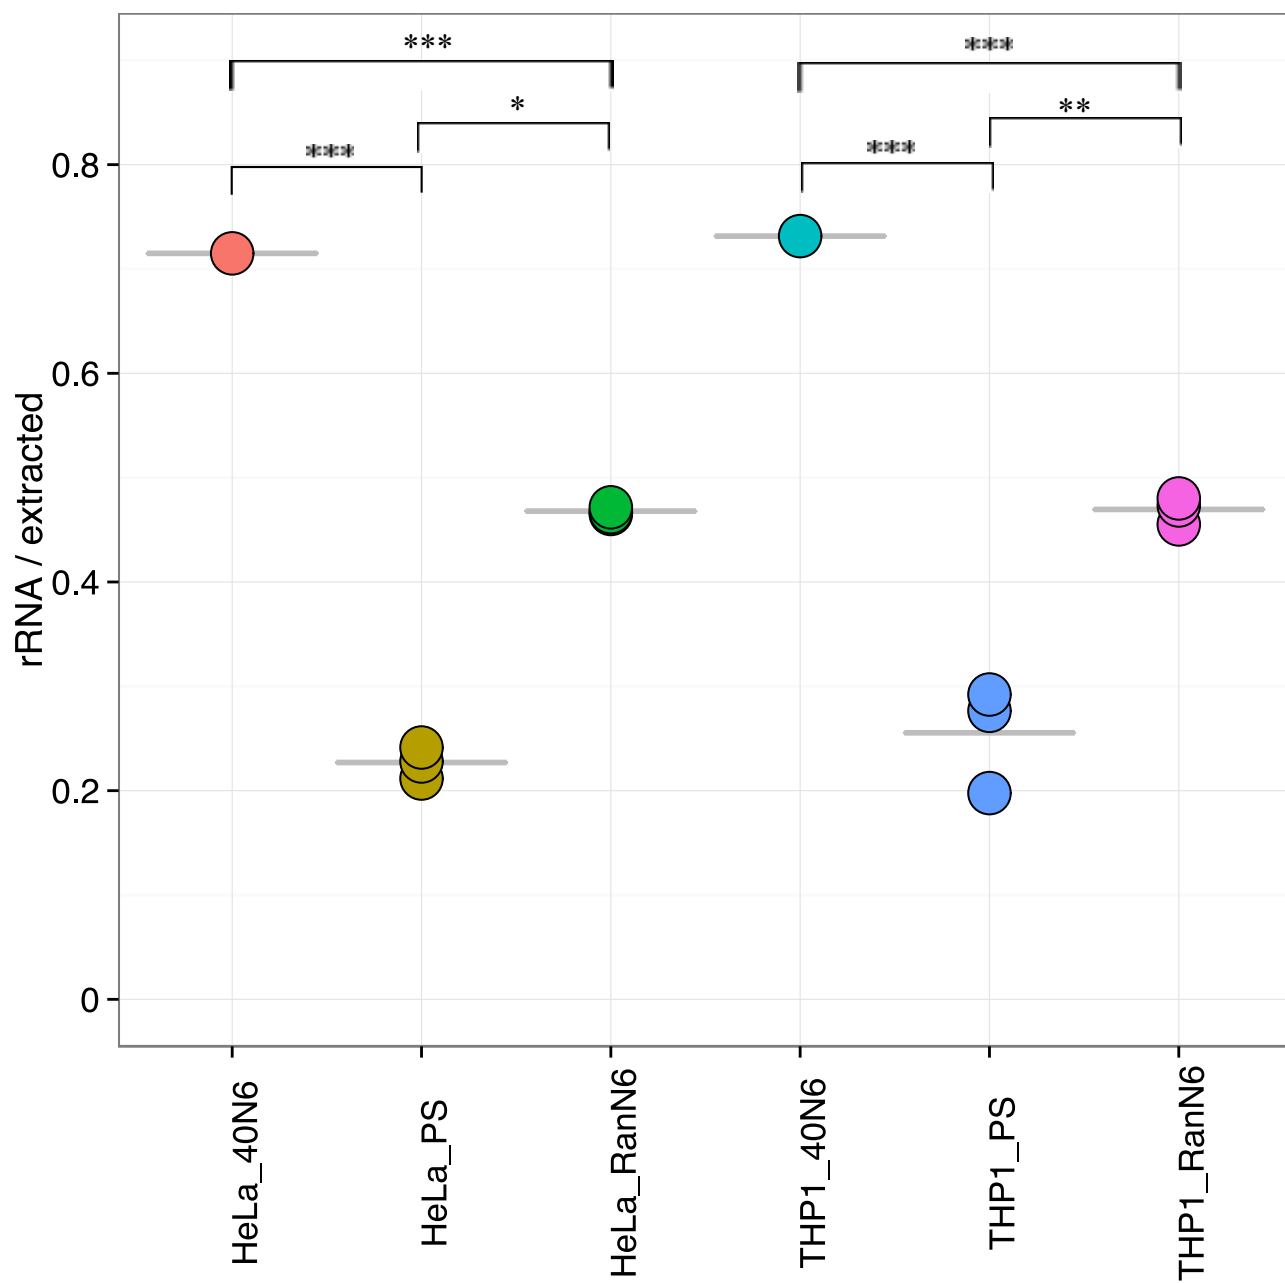



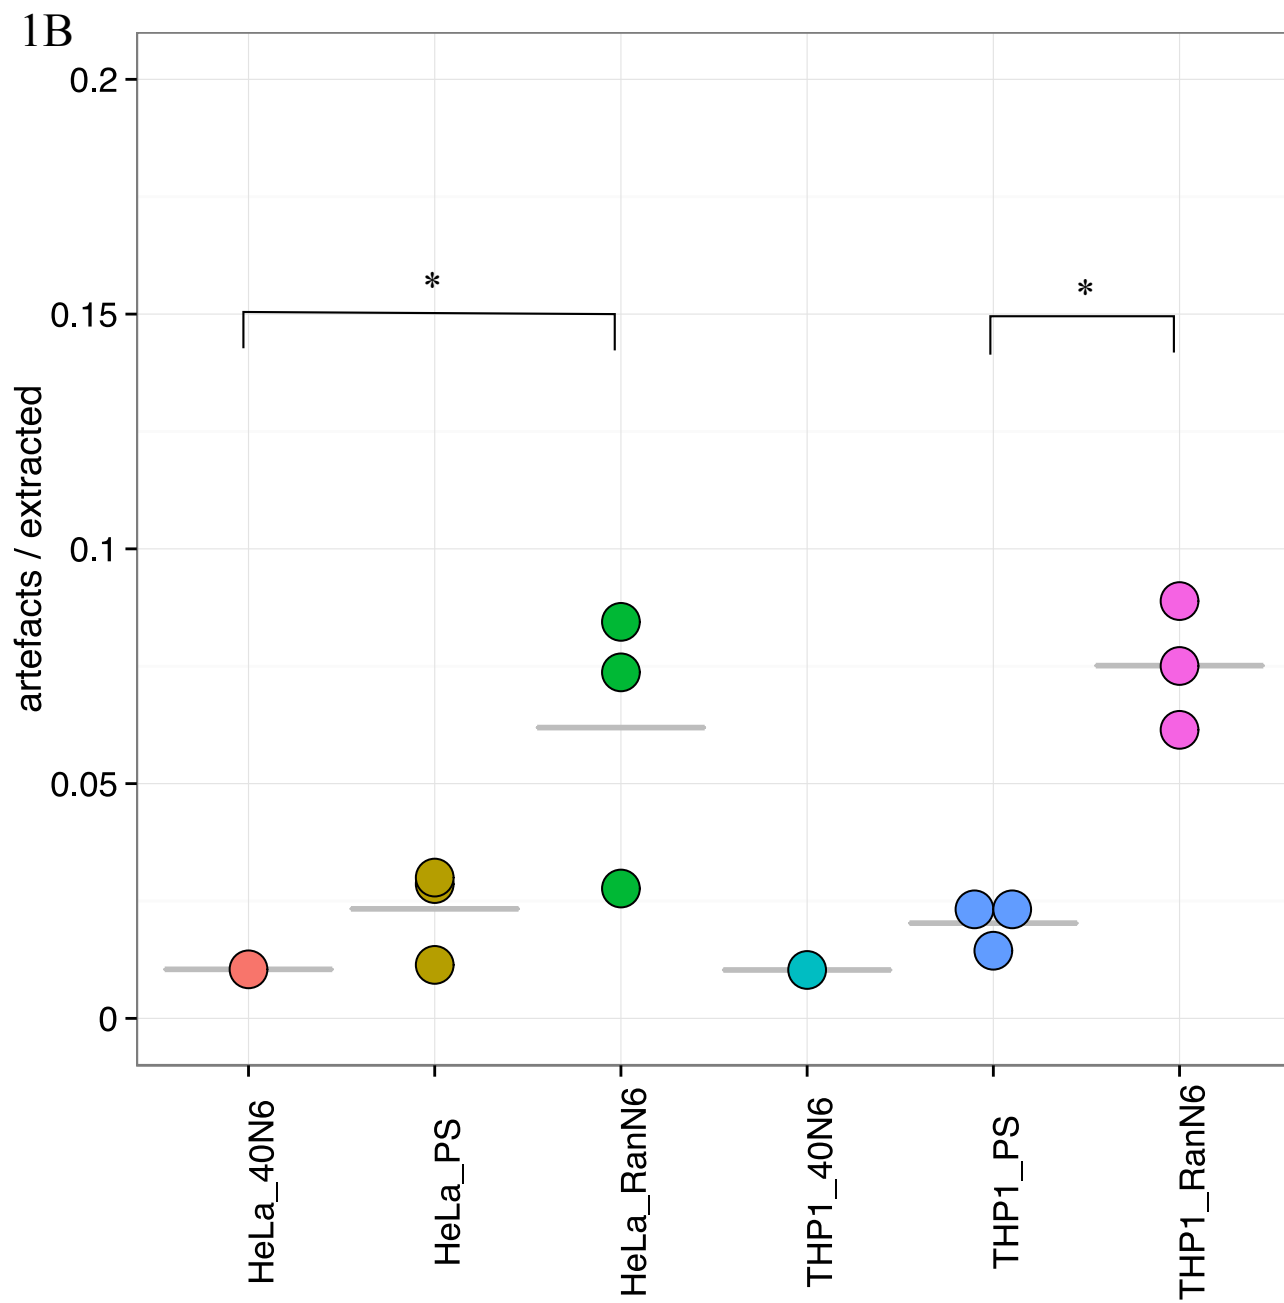

2A

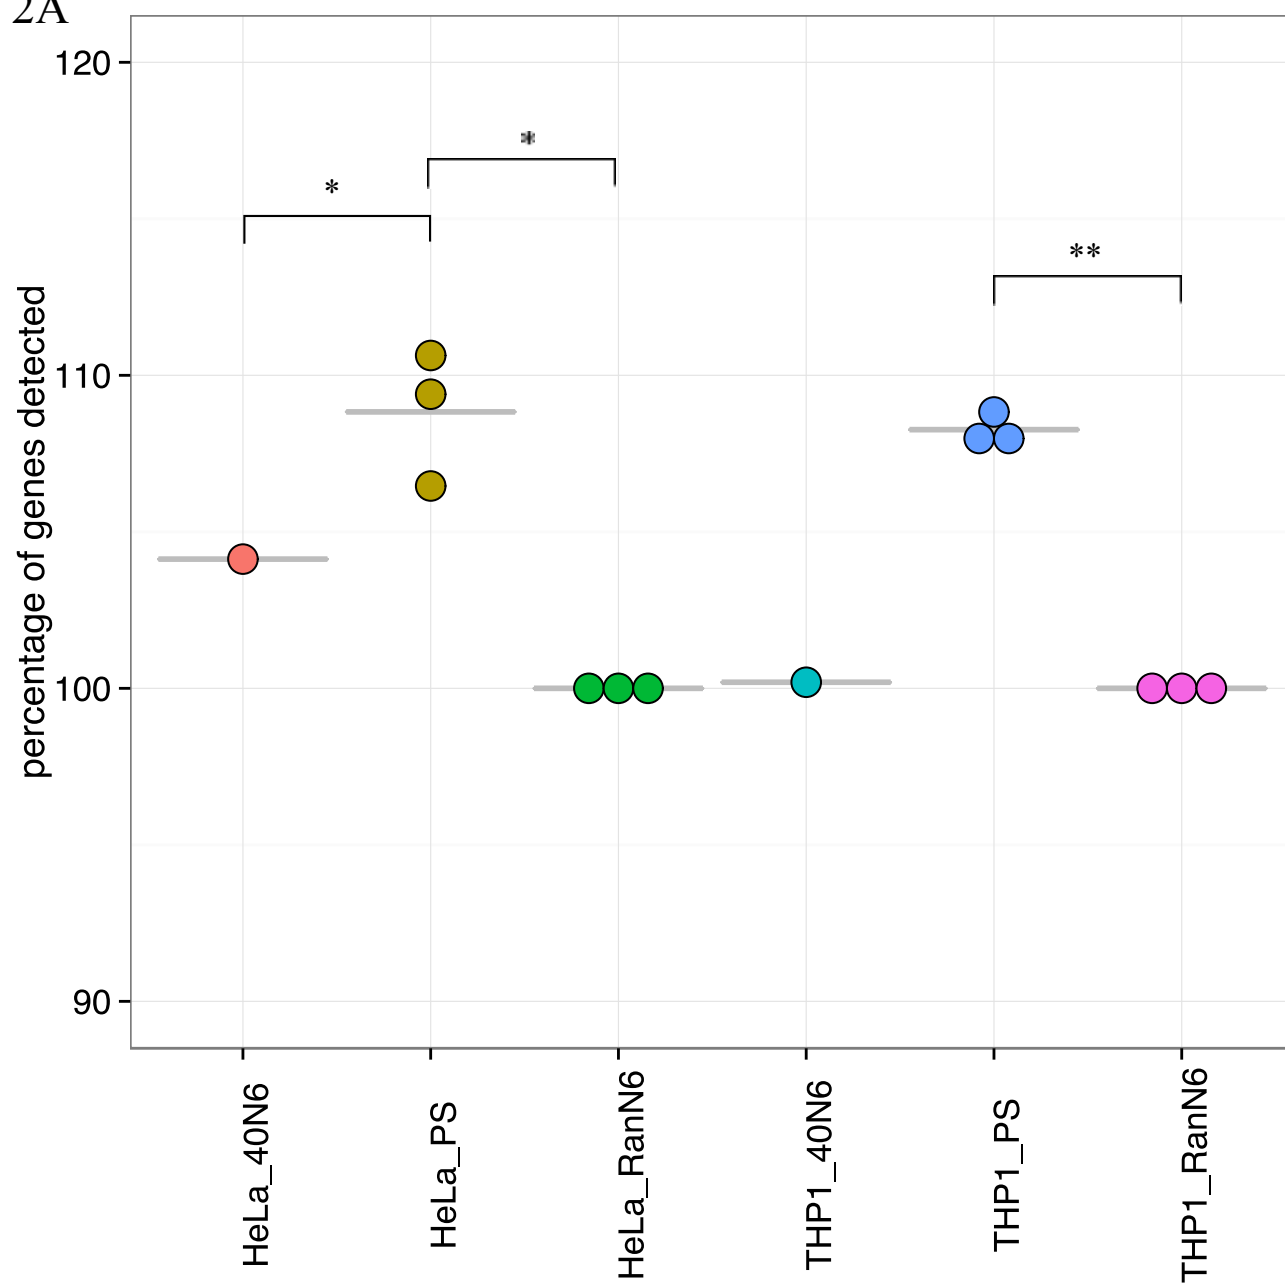

## pseudo-random primers

2B

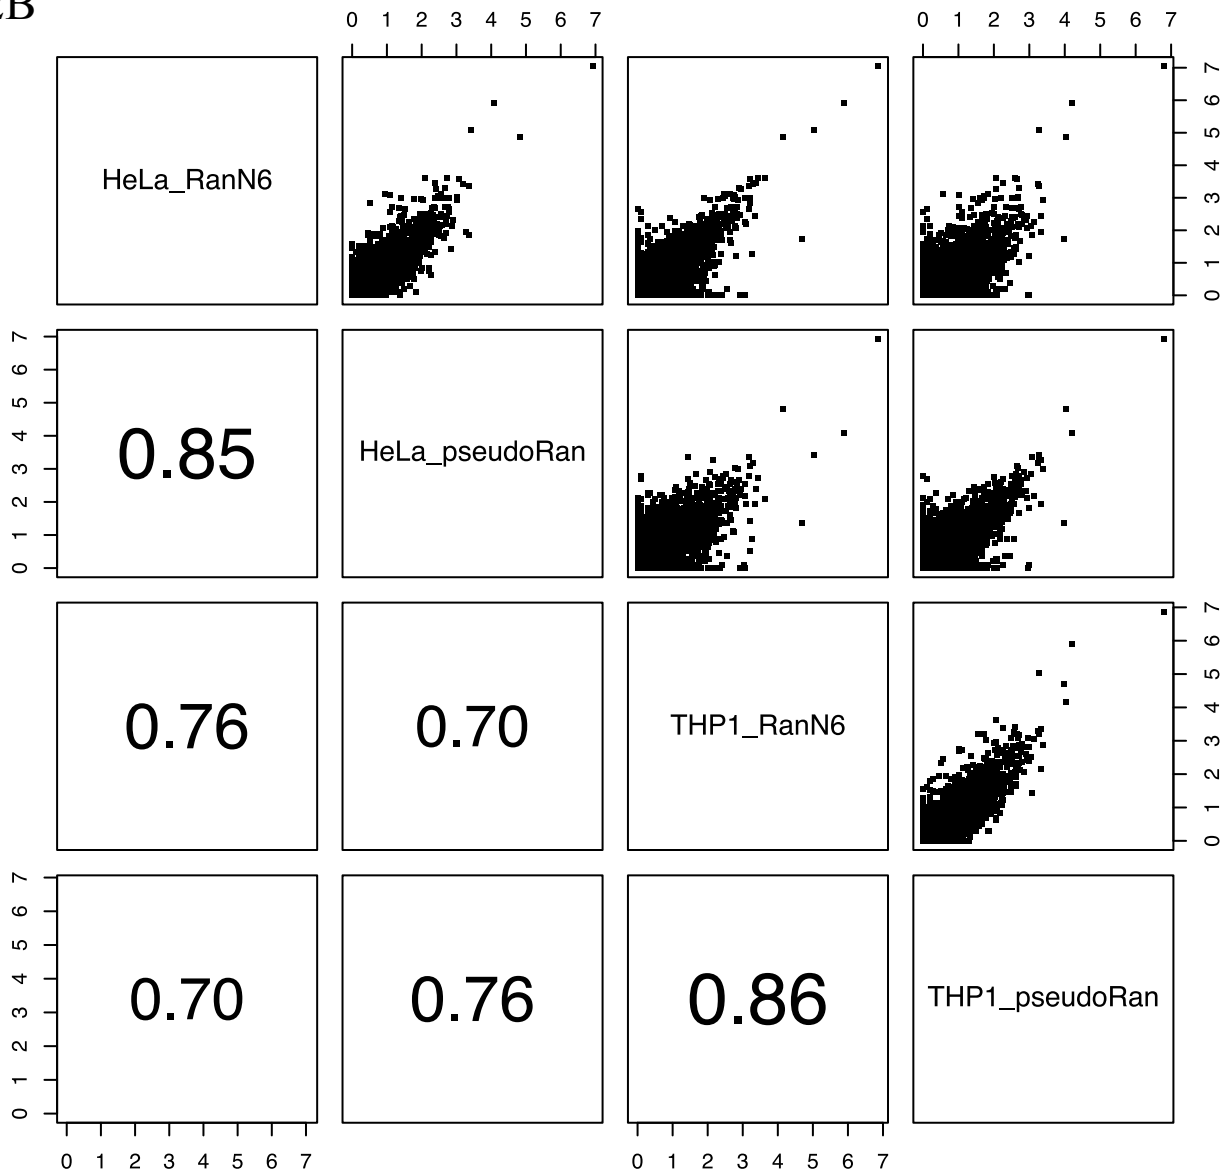

2C

### HeLa - THP-1 fold changes

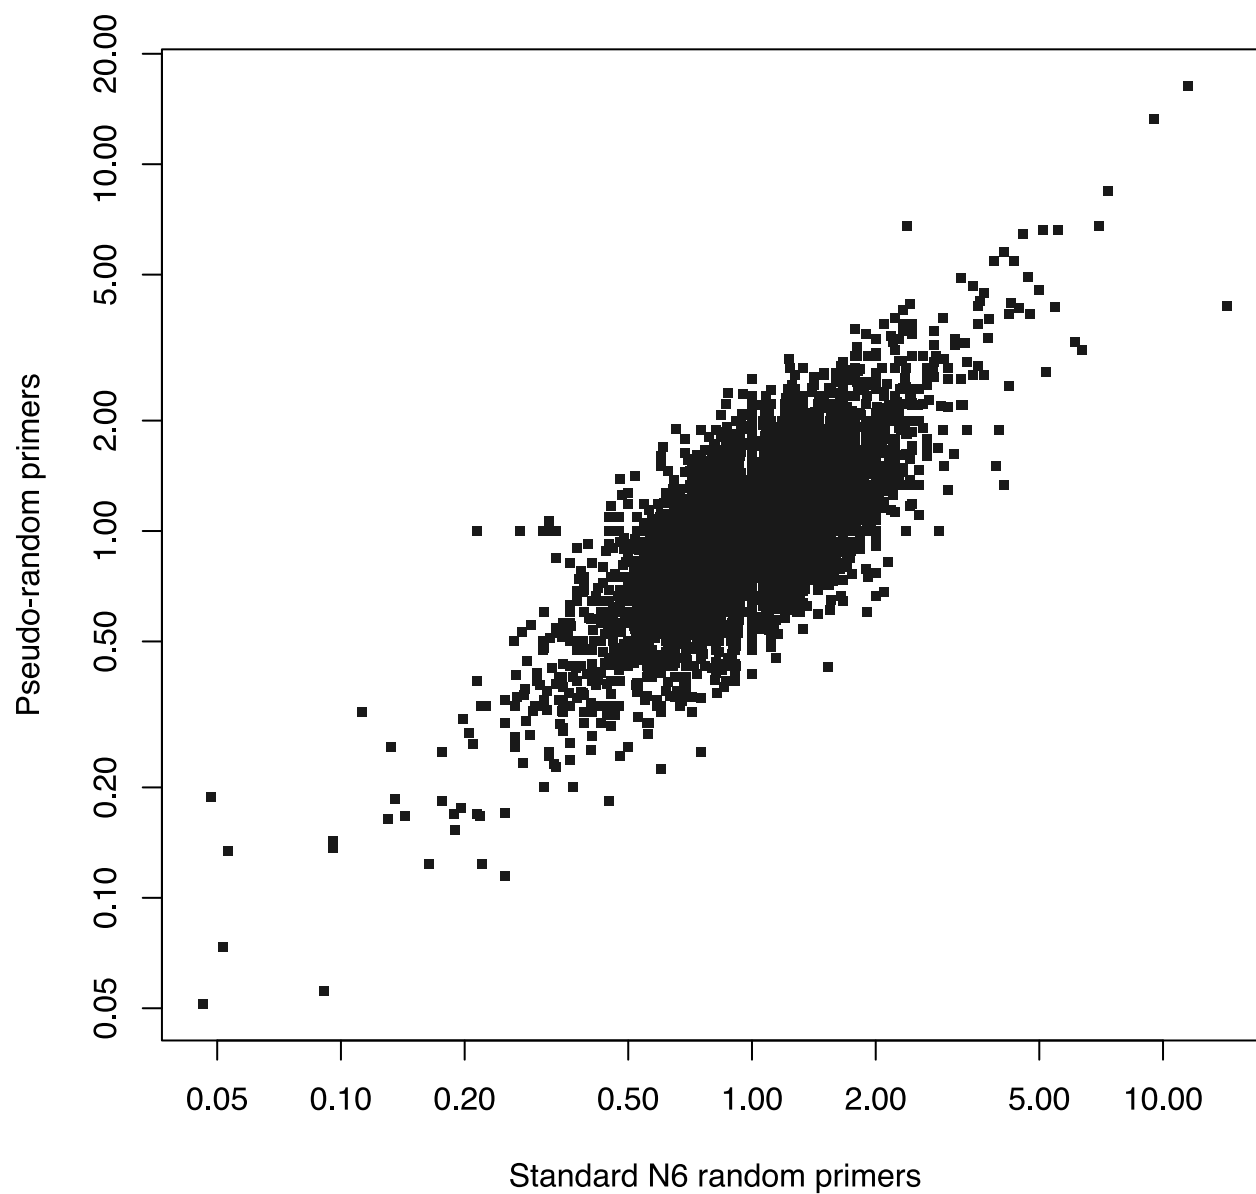

3

### Cluster dendrogram with AU/BP values (%)

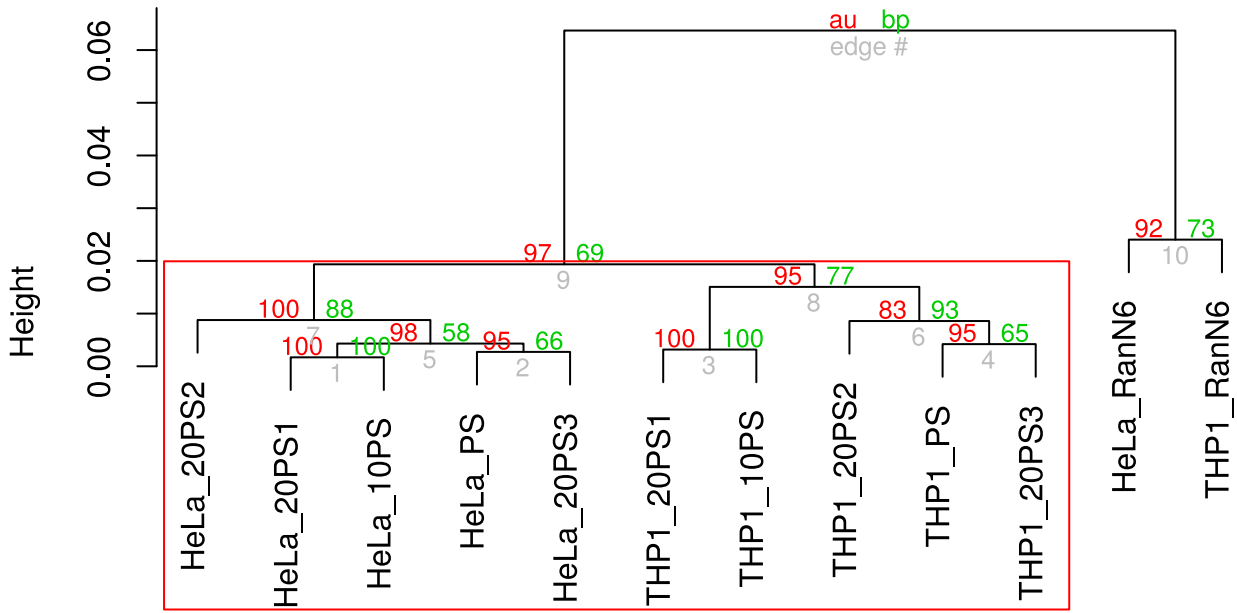

Distance: correlation  
Cluster method: average

4A

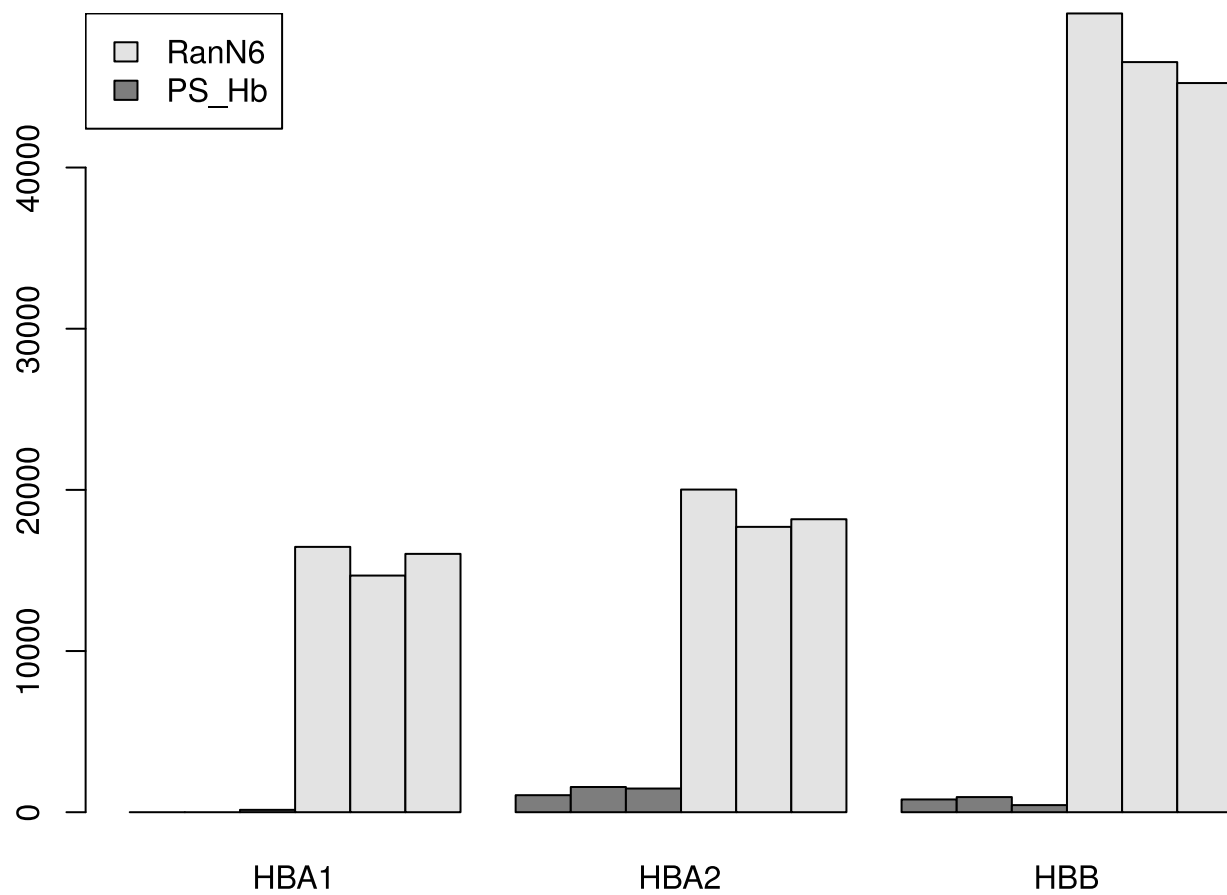

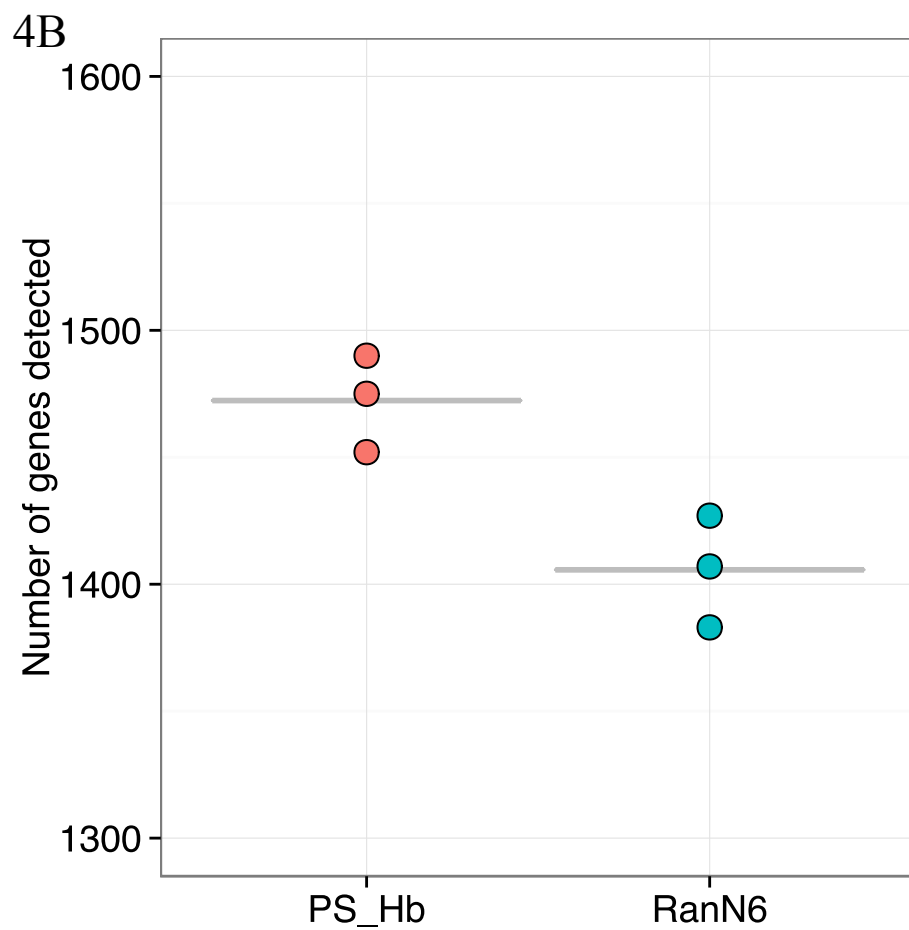

# Selection of Pseudo-random primers

## rRNA

Human:

hsu13369.fasta file produced with the command `extractfeat -type rRNA U13369.gb`. (from the EMBOSS package)

```
HSU13369_3657_5527 [rRNA] Human ribosomal DNA complete repeating unit.  
HSU13369_6623_6779 [rRNA] Human ribosomal DNA complete repeating unit.  
HSU13369_7935_12969 [rRNA] Human ribosomal DNA complete repeating unit.
```

## Mitochondrial

```
NC_012920_648_1601 [rRNA] Homo sapiens mitochondrion, complete genome.  
NC_012920_1671_3229 [rRNA] Homo sapiens mitochondrion, complete genome.
```

## Combination

```
(cat nc_012920.fasta hsu13369.fasta | revseq -filter | grep -v '>' | perl -pe  
chomp ; echo) > ribo.txt
```

## R code



```
acgt <- c('A', 'C', 'G', 'T')
LINKER <- 'CCCTATAAGATCGGAAGAGCGGTTTCGGAGACCTTCAGTTCGACTA'
BARCODES <- scan('barcodes.txt', what='character')
RIBO <- scan('ribo.txt', what='character') # See below in the wiki about the
file 'ribo.txt'.
hexamers <- apply(expand.grid(acgt, acgt, acgt, acgt, acgt, acgt), 1, paste,
collapse='')
hexamers <- data.frame(row.names=hexamers)
hexamers[,c('LINKER_0', 'LINKER_1', 'LINKER_2', 'LINKER_3', 'RIBO_0', 'RIBO_1',
', 'BARCODE')] <- c(rep(FALSE, 7))
hexamers[names(unlist(sapply(rownames(hexamers), function(X) {agrep(X, LINKER
, 0, ignore.case=T)})))] <- TRUE
hexamers[names(unlist(sapply(rownames(hexamers), function(X) {agrep(X, LINKER
, 1, ignore.case=T)})))] <- TRUE
hexamers[names(unlist(sapply(rownames(hexamers), function(X) {agrep(X, LINKER
, 2, ignore.case=T)})))] <- TRUE
hexamers[names(unlist(sapply(rownames(hexamers), function(X) {agrep(X, LINKER
, 3, ignore.case=T)})))] <- TRUE
hexamers[names(unlist(sapply(rownames(hexamers), function(X) {agrep(X, RIBO,
0, ignore.case=T)})))] <- TRUE
hexamers[names(unlist(sapply(rownames(hexamers), function(X) {agrep(X, RIBO,
1, ignore.case=T)})))] <- TRUE
hexamers[BARCODES, "BARCODE"] <- TRUE
```

```
summary(hexamers)
LINKER_0      LINKER_1      LINKER_2      LINKER_3      RIBO_0
RIBO_1      BARCODE
Mode :logical  Mode :logical  Mode :logical  Mode:logical  Mode :logical
Mode:logical  Mode :logical
FALSE:4056    FALSE:3082     FALSE:259      TRUE:4096     FALSE:719
TRUE:4096     FALSE:4000
TRUE :40      TRUE :1014     TRUE :3837     NA's:0        TRUE :3377
NA's:0        TRUE :96
NA's :0       NA's :0        NA's :0        NA's :0
```

```
with(hexamers, rownames(hexamers)[!(LINKER_2 | RIBO_0 | BARCODE)])
[1] "GCCAAA" "AGCAAA" "AAACAA" "ACACAA" "TGCCAA" "CAAACA" "CACACA" "TGCACA"
[9] "GTCACA" "TAGCCA" "GTGGCA" "TGTTTA" "ATTTTA" "CAAAAC" "CACAAC" "GCTAAC"
[17] "AACCAC" "CTACCC" "TACCCC" "CTAGCC" "CTGGCC" "TGTGCC" "ATTGCC" "CTACGC"
[25] "TATGGC" "TTGTGC" "ACCACG" "CACAGG" "ACTGTG" "TGCCAT" "TGGCAT" "GTGCAT"
[33] "TTGTAT" "ATTTAT" "TTTTAT" "TGGCGT" "TGTTGT" "ATTTGT" "TTGCTT" "TGTCTT"
```

# Selection PS\_Hb

## Haemoglobin sequences

alpha globin mRNA : [http://www.ncbi.nlm.nih.gov/nuccore/NM\\_000558](http://www.ncbi.nlm.nih.gov/nuccore/NM_000558)  
([http://www.ncbi.nlm.nih.gov/nuccore/NM\\_000558](http://www.ncbi.nlm.nih.gov/nuccore/NM_000558))

beta globin mRNA : [http://www.ncbi.nlm.nih.gov/nucore/NM\\_000518](http://www.ncbi.nlm.nih.gov/nucore/NM_000518) ([http://www.ncbi.nlm.nih.gov/nucore/NM\\_000518](http://www.ncbi.nlm.nih.gov/nucore/NM_000518))

The 2 fasta files are combined in 1 file named Hb.txt

## R Code

```
acgt <- c('A', 'C', 'G', 'T')
Hb <- scan('Hb.txt', what='character')
hexamers <- apply(expand.grid(acgt, acgt, acgt, acgt, acgt, acgt), 1, paste,
collapse='')
hexamers <- data.frame(row.names=hexamers)
hexamers[,c('Hb_0', 'Hb_1', 'Hb_2')] <- c(rep(FALSE,3 ))
hexamers[names(unlist(sapply(row.names(hexamers), function(X) {agrep(X, Hb, 0,
ignore.case=T)}))], "Hb_0"] <- TRUE
hexamers[names(unlist(sapply(row.names(hexamers), function(X) {agrep(X, Hb, 1,
ignore.case=T)}))], "Hb_1"] <- TRUE
hexamers[names(unlist(sapply(row.names(hexamers), function(X) {agrep(X, Hb, 2,
ignore.case=T)}))], "Hb_2"] <- TRUE
```

```
summary(hexamers)
      Hb_0      Hb_1      Hb_2
Mode :logical Mode :logical Mode:logical
FALSE:3154  FALSE:33    TRUE:4096
TRUE :942   TRUE :4063   NA's:0
NA's :0     NA's :0
```

```
with(hexamers, row.names(hexamers)[! (Hb_1)])
[1] "GTTAAA" "CGACAA" "GGATAA" "GTATAA" "CTACGA" "TATCGA" "CGAATA" "GATATA"
[9] "CGTATA" "GTACTA" "TACCTA" "ATCGTA" "CTCGTA" "TCGTTA" "TAAAAC" "TACAAC"
[17] "ATTTAC" "AAACCC" "TAATGC" "ATCTGC" "CTAATC" "ATTCCG" "CTATCG" "GATTCG"
[25] "TACGAT" "ATCGAT" "ATCTAT" "TCGTAT" "CTAATT" "TCCATT" "CCGATT" "TCGATT"
[33] "CGATTT"
```

## Selection of 40N6 primers

### R code

```
acgt <- c('A', 'C', 'G', 'T')
hexamers <- apply(expand.grid(acgt, acgt, acgt, acgt, acgt, acgt), 1, paste,
collapse='')
sample(hexamers,40)
[1] "CCAGTC" "CCCTTC" "TTTTTT" "CTGTAC" "TGACCG" "TGTGAT" "AACCTC" "AGGCGG"
[9] "TCGTCT" "CTACAA" "GTACGC" "CAGAAG" "GTGTCT" "GTGTGC" "AAGACT" "CGGGTA"
[17] "AAGAGA" "GAGGTG" "GCTCTT" "GGTGTG" "GCACGT" "TGAACT" "GGGGCG" "GAGAGG"
[25] "CCTCAG" "TAAGTT" "ATCTGC" "ACTTAA" "CACAGC" "AGATGA" "GGTAGC" "AAGGCC"
[33] "CGCAGG" "AACCTC" "CAGTTG" "ATTCCC" "AGATGG" "GCGGAC" "CTGGCG" "CTTCAC"
```



# Common analysis for all the experiments

## configuration

Use appropriate names instead of xxx (see detailed commands for each experiment)

```
library(plyr)

exportInEnv <- function(X) {
  Name <- X
  Value <- get(X)
  .Internal(Sys.setenv(Name, value))
  cat( paste0("export ", paste(Name, value, sep='='), "\n"))
}

LIBRARY <- 'xxx'
MOIRAI_USER <- 'xxx'
MOIRAI_PROJECT <- 'xxx'
GROUP_SHARED <- 'xxx'
WORKDIR <- '.'
GENE_SYMBOLS <- paste(GROUP_SHARED,
'annotation/homo_sapiens/gencode-
14/gencode.v14.annotation.genes.bed', sep='/')
ANNOTATION <- paste(GROUP_SHARED,
'annotation/homo_sapiens/100712hg19/100712hg19', sep='/')
PROCESSED_DATA <- dirname( system( paste( 'ls -d /osc-fs_home
/scratch/moirai/'
, MOIRAI_USER
, '/project/'
, MOIRAI_PROJECT
, '/'
, LIBRARY
, '*/Moirai.config'
, sep='')
, intern=TRUE)[1])

l_ply( c("LIBRARY", "MOIRAI_USER", "MOIRAI_PROJECT",
"GROUP_SHARED"
, "WORKDIR", "GENE_SYMBOLS", "ANNOTATION",
"PROCESSED_DATA")
, exportInEnv )
```

## Cluster with the PromoterPipeline

### Level 1

Transform the paired-end alignments into level 1 clusters, sort the file and index it. Select

only BAM files that contain aligned reads.

```
ALIGNED_DATA=$(for BAM in
$PROCESSED_DATA/properly_paired_rmdup/*bam; do samtools
flagstat $BAM | grep -Lq '^0 + 0 mapped' || echo $BAM ; done)

level1.py --help | head -n1

level1.py -o /dev/stdout -f 66 -F 516 $ALIGNED_DATA |
  bgzip > $LIBRARY.l1.gz
cat <(zgrep \# -A1 $LIBRARY.l1.gz) <(zgrep -v \#
$LIBRARY.l1.gz | sed '1d' |
  sort --field-separator '$\t' -k2.4,2n -k 2.4,2.4 -k3,3n
-k4,4n -k5,5) |
  bgzip |
  sponge $LIBRARY.l1.gz
#tabix -s2 -b3 -e4 $LIBRARY.l1.gz
```

## Level 2

Same for level 2 clusters.

Needs a version of level2.py that is more recent than 20120628, where the “Output” message is sent to stderr.

```
level2.py --help | head -n1

level2.py -o /dev/stdout -t 0 $LIBRARY.l1.gz |
  bgzip > $LIBRARY.l2.gz
cat <(zgrep \# -A1 $LIBRARY.l2.gz) <(zgrep -v \#
$LIBRARY.l2.gz | sed '1d' |
  sort --field-separator '$\t' -k2.4,2n -k 2.4,2.4 -k3,3n
-k4,4n -k5,5) |
  bgzip |
  sponge $LIBRARY.l2.gz
#tabix -s2 -b3 -e4 $LIBRARY.l2.gz
```

## Intersections

Convert level 1 and 2 files to BED format, and intersect them with pre-defined annotation files.

```
function osc2bed {
  zcat $1 |
  grep -v \# |
  sed 1d |
  awk '{OFS="\t"}{print $2, $3, $4, "11", "1000", $5}'
}

function bed2annot {
  bedtools intersect -a $1 -b $ANNOTATION.annot -s -loj |
  awk '{OFS="\t"}{print $1:"$2"-"$3$6,$10}' |
  bedtools groupby -g 1 -c 2 -o collapse
}

for LEVEL in 11 12
do
  osc2bed $LIBRARY.$LEVEL.gz | tee $LIBRARY.$LEVEL.bed |
  bed2annot - > $LIBRARY.$LEVEL.annot
done
```

## Gene symbols

```
function bed2symbols {
  bedtools intersect -a $1 -b $GENE_SYMBOLS -s -loj |
  awk '{OFS="\t"}{print $1:"$2"-"$3$6,$10}' |
  bedtools groupby -g 1 -c 2 -o distinct >
  $LIBRARY.12.genes
}

if [ $GENE_SYMBOLS ]
then
  bed2symbols $LIBRARY.12.bed > $LIBRARY.12.genes
fi
```

# Analyze of the first experiment: NCms10058

## Configuration

```
library(plyr)

exportInEnv <- function(X) {
  Name <- X
  Value <- get(X)
  .Internal(Sys.setenv(Name, Value))
  cat( paste0("export ", paste(Name, Value, sep=' '), "\n"))
}

LIBRARY <- 'NCms10058_1'
MOIRAI_USER <- 'nanoCAGE2'
MOIRAI_PROJECT <- 'Arnaud'
GROUP_SHARED <- '/osc-fs_home/scratch/gmtu'
WORKDIR <- '.'
GENE_SYMBOLS <- paste(GROUP_SHARED, 'annotation/homo_sapiens/gencode-14/gen
code.v14.annotation.genes.bed', sep='/')
ANNOTATION <- paste(GROUP_SHARED, 'annotation/homo_sapiens/100712hg19/100
712hg19', sep='/')
PROCESSED_DATA <- dirname( system( paste( 'ls -d /osc-fs_home/scratch/moirai/
',
                                          , MOIRAI_USER
                                          , '/project/'
                                          , MOIRAI_PROJECT
                                          , '/'
                                          , LIBRARY
                                          , '*/Moirai.config'
                                          , sep='')
                            , intern=TRUE)[1])

l_ply( c("LIBRARY", "MOIRAI_USER", "MOIRAI_PROJECT", "GROUP_SHARED"
        , "WORKDIR", "GENE_SYMBOLS", "ANNOTATION", "PROCESSED_DATA")
      , exportInEnv )
```

```
export LIBRARY=NCms10058_1
export MOIRAI_USER=nanoCAGE2
export MOIRAI_PROJECT=Arnaud
export GROUP_SHARED=/osc-fs_home/scratch/gmtu
export WORKDIR=.
export GENE_SYMBOLS=/osc-fs_home/scratch/gmtu/annotation/homo_sapiens/gencode
-14/gencode.v14.annotation.genes.bed
export ANNOTATION=/osc-fs_home/scratch/gmtu/annotation/homo_sapiens/100712hg1
9/100712hg19
export PROCESSED_DATA=/osc-fs_home/scratch/moirai/nanoCAGE2/project/Arnaud/NC
ms10058_1.CAGEScan_short-reads.20150625154711
```

## Count the reads

```
awk '/raw/ {print $3}' $PROCESSED_DATA/text/summary.txt |
/usr/lib/filo/stats |
grep 'Sum' |
cut -f2 -d':' |
tr -d '[:space:]' |
xargs -0 /usr/bin/printf " # %'d\n"
```

```
## # 3608777
```

```
grep raw $PROCESSED_DATA/text/summary.txt
```

```
## NCms10058_1.ACAGTG.R1    raw 95519
## NCms10058_1.ACTTGA.R1   raw 76278
## NCms10058_1.ATCACG.R1   raw 53374
## NCms10058_1.CAGATC.R1   raw 103408
## NCms10058_1.CGATGT.R1   raw 73164
## NCms10058_1.CTTGTA.R1   raw 134779
## NCms10058_1.GATCAG.R1   raw 95648
## NCms10058_1.GCCAAT.R1   raw 76012
## NCms10058_1.GGCTAC.R1   raw 56348
## NCms10058_1.TAGCTT.R1   raw 54492
## NCms10058_1.TGACCA.R1   raw 63262
## NCms10058_1.TTAGGC.R1   raw 95230
## NCms10058_1.Undetermined.R1 raw 2631263
```

## Analysis with R

### Configuration



```
library(oscR) # See https://github.com/charles-plessy/oscR for oscR.
if (compareVersion(sessionInfo()$otherPkgs$oscR$Version,'0.1.1') < 0) stop('Outdated version of oscR.')
```

```
library(smallCAGEqc) # See https://github.com/charles-plessy/smallCAGEqc for smallCAGEqc.
if (compareVersion(sessionInfo()$otherPkgs$smallCAGEqc$Version,'0.6.0') < 0) stop('Outdated version of smallCAGEqc')
```

```
library(vegan)
```

```
## Loading required package: permute
## Loading required package: lattice
## This is vegan 2.0-10
```

```
library(ggplot2)
```

## Load data

```
l2_NCKi <- read.osc(paste(LIBRARY,'l2','gz',sep='.'), drop.coord=T, drop.norm=T)

colnames(l2_NCKi) <- sub('raw.NCms10058_1.','NCKi_',colnames(l2_NCKi))

colSums(l2_NCKi)
```

```
##      NCKi_HeLa_PS_A      NCKi_HeLa_PS_B      NCKi_HeLa_PS_C      NCKi_HeLa_RanN6_A      NCKi_HeLa_RanN6_B      NCKi_HeLa_RanN6_C
##                11800                13969                22764                14137
##                13556                10430
##      NCKi_THP1_PS_A      NCKi_THP1_PS_B      NCKi_THP1_PS_C      NCKi_THP1_RanN6_A      NCKi_THP1_RanN6_B      NCKi_THP1_RanN6_C
##                15157                15453                13092                8708
##                14536                17122
```

## Normalization number of read per sample : l2.sub ; libs\$genes.sub

In all the 3 libraries used, one contain only few reads tags. The smallest one has 8,708 counts. In order to make meaningful comparisons, all of them are subsampled to 8700 counts.

```
l2.sub1 <- t(rrarefy(t(l2_NCKi),min(8700)))

colSums(l2.sub1)
```

```
##      NCKi_HeLa_PS_A      NCKi_HeLa_PS_B      NCKi_HeLa_PS_C NCKi_HeLa_RanN6_A NC
ki_HeLa_RanN6_B NCKi_HeLa_RanN6_C
##              8700              8700              8700              8700
              8700              8700
##      NCKi_THP1_PS_A      NCKi_THP1_PS_B      NCKi_THP1_PS_C NCKi_THP1_RanN6_A NC
ki_THP1_RanN6_B NCKi_THP1_RanN6_C
##              8700              8700              8700              8700
              8700              8700
```

## Moirai statistics

Load the QC data produced by the Moirai workflow with which the libraries were processed. Sort in the same way as the l1 and l2 tables, to allow for easy addition of columns.

```
libs <- loadLogs('moirai')
```

## Number of clusters

Count the number of unique L2 clusters per libraries after subsampling, and add this to the QC table. Each subsampling will give a different result, but the mean result can be calculated by using the `rarefy` function at the same scale as the subsampling.

```
libs["l2.sub1"]      <- colSums(l2.sub1 > 0)
libs["l2.sub1.exp"] <- rarefy(t(l2_NCKi), min(colSums(l2_NCKi)))
```

## Richness

Richness should also be calculated on the whole data.

```
libs["r100.l2"] <- rarefy(t(l2_NCKi),100)

boxplot(data=libs, r100.l2 ~ group, ylim=c(92,100), las=1)
```

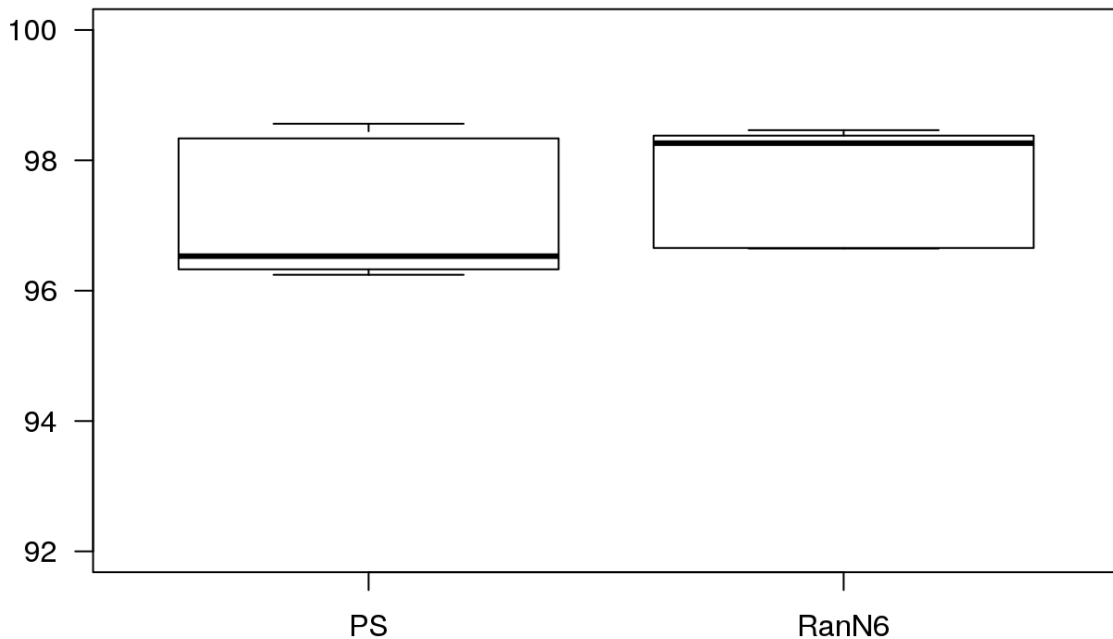

## Hierarchical annotation

Differences of sampling will not bias distort the distribution of reads between annotations, so the non-sampled library is used here.

```
annot.l2 <- read.table(paste(LIBRARY,'l2','annot',sep='.'), head=F, col.names
=c('id', 'feature'), row.names=1)
annot.l2 <- hierarchAnnot(annot.l2)

rownames(libs) <- sub("HeLa", "NCKi_HeLa", rownames(libs))
rownames(libs) <- sub("THP1", "NCKi_THP1", rownames(libs))

libs <- cbind(libs, t(rowsum(l2_NCKi, annot.l2[, 'class'])))
libs$samplename <- sub('HeLa', 'NCKi_HeLa', libs$samplename)
libs$samplename <- sub('THP1', 'NCKi_THP1', libs$samplename)
```

## Gene symbols used normalisation data

```
genesymbols <- read.table(paste(LIBRARY,'l2','genes',sep='.'), col.names=c("c
luster","symbol"), stringsAsFactors=FALSE)
rownames(genesymbols) <- genesymbols$cluster

g2 <- rowsum(l2_NCKi, genesymbols$symbol)
countSymbols <- countSymbols(g2)

libs[colnames(l2_NCKi),"genes"] <- (countSymbols)
```

Number of genes detected in sub-sample

```
l2.sub1 <- data.frame(l2.sub1)
g2.sub1 <- rowsum(l2.sub1, genesymbols$symbol)
countSymbols.sub1 <- countSymbols(g2.sub1)
libs[colnames(l2.sub1),"genes.sub1"] <- (countSymbols.sub1)
```

## Table record

save the different tables produced for later analysis

```
write.table(l2_NCKi, "l2_NCKi_1.txt", sep = "\t", quote=FALSE)
write.table(l2.sub1, "l2.sub1_NCKi_1.txt", sep = "\t", quote=FALSE)
write.table(g2.sub1, 'g2.sub1_NCKi_1.txt', sep="\t", quote=F)
write.table(libs, 'libs_NCKi_1.txt', sep="\t", quote=F)
```

# Analyze of the second experiment: NC12

## configuration

```
library(plyr)

exportInEnv <- function(X) {
  Name <- X
  Value <- get(X)
  .Internal(Sys.setenv(Name, Value))
  cat( paste0("export ", paste(Name, Value, sep=' '), "\n"))
}

LIBRARY <- 'NC12_1'
MOIRAI_USER <- 'nanoCAGE2'
MOIRAI_PROJECT <- 'Arnaud'
GROUP_SHARED <- '/osc-fs_home/scratch/gmtu'
WORKDIR <- '.'
GENE_SYMBOLS <- paste(GROUP_SHARED, 'annotation/homo_sapiens/gencode-14/gen
code.v14.annotation.genes.bed', sep='/')
ANNOTATION <- paste(GROUP_SHARED, 'annotation/homo_sapiens/100712hg19/100
712hg19', sep='/')
PROCESSED_DATA <- dirname( system( paste( 'ls -d /osc-fs_home/scratch/moirai/
',
                                          , MOIRAI_USER
                                          , '/project/'
                                          , MOIRAI_PROJECT
                                          , '/'
                                          , LIBRARY
                                          , '*/Moirai.config'
                                          , sep='')
                              , intern=TRUE)[1])

l_ply( c("LIBRARY", "MOIRAI_USER", "MOIRAI_PROJECT", "GROUP_SHARED"
        , "WORKDIR", "GENE_SYMBOLS", "ANNOTATION", "PROCESSED_DATA")
      , exportInEnv )
```

```
export LIBRARY=NC12_1
export MOIRAI_USER=nanoCAGE2
export MOIRAI_PROJECT=Arnaud
export GROUP_SHARED=/osc-fs_home/scratch/gmtu
export WORKDIR=.
export GENE_SYMBOLS=/osc-fs_home/scratch/gmtu/annotation/homo_sapiens/gencode
-14/gencode.v14.annotation.genes.bed
export ANNOTATION=/osc-fs_home/scratch/gmtu/annotation/homo_sapiens/100712hg1
9/100712hg19
export PROCESSED_DATA=/osc-fs_home/scratch/moirai/nanoCAGE2/project/Arnaud/NC
12_1.CAGEScan_short-reads.20150629125015
```

## Count the reads

```
awk '/raw/ {print $3}' $PROCESSED_DATA/text/summary.txt |
/usr/lib/filo/stats |
grep 'Sum' |
cut -f2 -d':' |
tr -d '[:space:]' |
xargs -0 /usr/bin/printf " # %'d\n"
```

```
## # 3450701
```

```
grep raw $PROCESSED_DATA/text/summary.txt
```

```
## NC12_1.ACAGTG.R1 raw 340256
## NC12_1.ATCACG.R1 raw 437139
## NC12_1.CGATGT.R1 raw 274252
## NC12_1.GCCAAT.R1 raw 390496
## NC12_1.TGACCA.R1 raw 287340
## NC12_1.TTAGGC.R1 raw 316502
## NC12_1.Undetermined.R1 raw 1404716
```

## Analysis with R

### Configuration

```
library(oscR) # See https://github.com/charles-plessy/oscR for oscR.  
if (compareVersion(sessionInfo()$otherPkgs$oscR$Version, '0.1.1') < 0) stop('Outdated version of oscR.')
```

```
library(smallCAGEqc) # See https://github.com/charles-plessy/smallCAGEqc for smallCAGEqc.  
if (compareVersion(sessionInfo()$otherPkgs$smallCAGEqc$Version, '0.6.0') < 0) stop('Outdated version of smallCAGEqc')
```

```
library(vegan)
```

```
## Loading required package: permute  
## Loading required package: lattice  
## This is vegan 2.0-10
```

```
library(ggplot2)
```

## Load data

```
l2_NC12 <- read.osc(paste(LIBRARY, 'l2', 'gz', sep='.'), drop.coord=T, drop.norm=T)  
  
colnames(l2_NC12) <- sub('raw.NC12_1', 'NC12', colnames(l2_NC12))  
  
colSums(l2_NC12)
```

```
## NC12.HeLa_40N6_A NC12.HeLa_40N6_B NC12.HeLa_40N6_C NC12.HeLa_PS_A  
NC12.HeLa_PS_B NC12.HeLa_PS_C  
## 12154 17411 20790 24065  
27215 54835  
## NC12.HeLa_RanN6_A NC12.HeLa_RanN6_B NC12.HeLa_RanN6_C NC12.THP1_40N6_A N  
C12.THP1_40N6_B NC12.THP1_40N6_C  
## 10944 35582 23215 9271  
15299 15775  
## NC12.THP1_PS_A NC12.THP1_PS_B NC12.THP1_PS_C NC12.THP1_RanN6_A NC  
12.THP1_RanN6_B NC12.THP1_RanN6_C  
## 21303 23454 37395 13356  
58890 34922
```

## Normalization number of read per sample: `l2.sub ; libs$genes.sub`

In all the 3 libraries used, one contain only few reads tags. The smallest one has 8,708 counts. In order to make meaningful comparisons, all of them are subsampled to 8700 counts.

```
l2.sub1 <- t(rrarefy(t(l2_NC12),min(8700)))  
  
colSums(l2.sub1)
```

```
## NC12.HeLa_40N6_A NC12.HeLa_40N6_B NC12.HeLa_40N6_C NC12.HeLa_PS_A  
NC12.HeLa_PS_B NC12.HeLa_PS_C  
## 8700 8700 8700 8700  
8700 8700  
## NC12.HeLa_RanN6_A NC12.HeLa_RanN6_B NC12.HeLa_RanN6_C NC12.THP1_40N6_A N  
C12.THP1_40N6_B NC12.THP1_40N6_C  
## 8700 8700 8700 8700  
8700 8700  
## NC12.THP1_PS_A NC12.THP1_PS_B NC12.THP1_PS_C NC12.THP1_RanN6_A NC  
12.THP1_RanN6_B NC12.THP1_RanN6_C  
## 8700 8700 8700 8700  
8700 8700
```

## Moirai statistics

Load the QC data produced by the Moirai workflow with which the libraries were processed. Sort in the same way as the l1 and l2 tables, to allow for easy addition of columns.

```
libs <- loadLogs('moirai')  
rownames(libs) <- sub('HeLa', 'NC12.HeLa', rownames(libs))  
rownames(libs) <- sub('THP1', 'NC12.THP1', rownames(libs))
```

## Number of clusters

Count the number of unique L2 clusters per libraries after subsampling, and add this to the QC table. Each subsampling will give a different result, but the mean result can be calculated by using the `rarefy` function at the same scale as the subsampling.

```
libs["l2.sub1"] <- colSums(l2.sub1 > 0)  
libs["l2.sub1.exp"] <- rarefy(t(l2_NC12), min(colSums(l2_NC12)))
```

## Richness

Richness should also be calculated on the whole data.

```
libs["r100.l2"] <- rarefy(t(l2_NC12),100)  
  
boxplot(data=libs, r100.l2 ~ group, ylim=c(92,100), las=1)
```



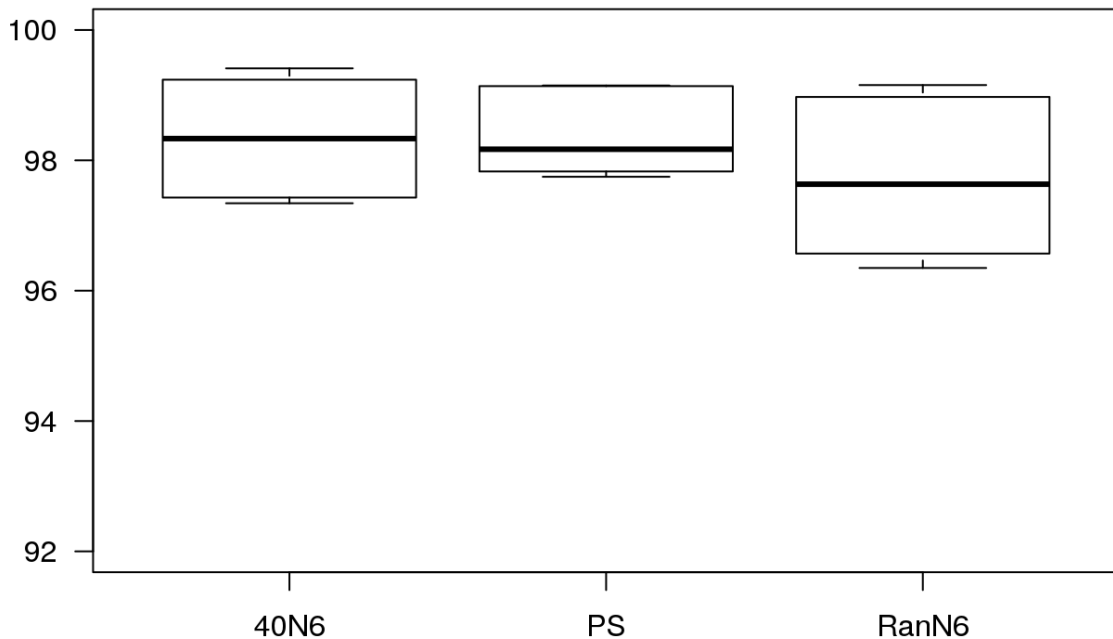

## Hierarchical annotation

Differences of sampling will not bias distort the distribution of reads between annotations, so the non-sampled library is used here.

```
annot.l2 <- read.table(paste(LIBRARY,'l2','annot',sep='.'), head=F, col.names
=c('id', 'feature'), row.names=1)
annot.l2 <- hierarchAnnot(annot.l2)

libs <- cbind(libs, t(rowsum(l2_NC12, annot.l2[, 'class'])))
libs$samplename <- sub('HeLa', 'NC12_HeLa', libs$samplename)
libs$samplename <- sub('THP1', 'NC12_THP1', libs$samplename)
```

## Gene symbols used normalisation data

```
genesymbols <- read.table(paste(LIBRARY,'l2','genes',sep='.'), col.names=c("c
luster","symbol"), stringsAsFactors=FALSE)
rownames(genesymbols) <- genesymbols$cluster

g2 <- rowsum(l2_NC12, genesymbols$symbol)
countSymbols <- countSymbols(g2)

libs[colnames(l2_NC12),"genes"] <- (countSymbols)
```

Number of genes detected in sub-sample

```
l2.sub1 <- data.frame(l2.sub1)
g2.sub1 <- rowsum(l2.sub1, genesymbols$symbol)
countSymbols.sub1 <- countSymbols(g2.sub1)
libs[colnames(l2.sub1), "genes.sub1"] <- (countSymbols.sub1)
```

## Table record

save the different tables produced for later analysis

```
write.table(l2_NC12, "l2_NC12_1.txt", sep = "\t", quote=FALSE)
write.table(l2.sub1, "l2.sub1_NC12_1.txt", sep = "\t", quote=FALSE)
write.table(g2.sub1, 'g2.sub1_NC12_1.txt', sep="\t", quote=F)
write.table(libs, 'libs_NC12_1.txt', sep="\t", quote=F)
```

# Analyze of the third experiment: NC17

## Configuration

```
library(plyr)

exportInEnv <- function(X) {
  Name <- X
  Value <- get(X)
  .Internal(Sys.setenv(Name, Value))
  cat( paste0("export ", paste(Name, Value, sep=' '), "\n"))
}

LIBRARY <- 'NC16-17_1'
MOIRAI_USER <- 'nanoCAGE2'
MOIRAI_PROJECT <- 'Arnaud'
GROUP_SHARED <- '/osc-fs_home/scratch/gmtu'
WORKDIR <- '.'
GENE_SYMBOLS <- paste(GROUP_SHARED, 'annotation/homo_sapiens/gencode-14/gen
code.v14.annotation.genes.bed', sep='/')
ANNOTATION <- paste(GROUP_SHARED, 'annotation/homo_sapiens/100712hg19/100
712hg19', sep='/')
PROCESSED_DATA <- dirname( system( paste( 'ls -d /osc-fs_home/scratch/moirai/
',
                                          , MOIRAI_USER
                                          , '/project/'
                                          , MOIRAI_PROJECT
                                          , '/'
                                          , LIBRARY
                                          , '*/Moirai.config'
                                          , sep='')
                              , intern=TRUE)[1])

l_ply( c("LIBRARY", "MOIRAI_USER", "MOIRAI_PROJECT", "GROUP_SHARED"
        , "WORKDIR", "GENE_SYMBOLS", "ANNOTATION", "PROCESSED_DATA")
      , exportInEnv )
```

```
export LIBRARY=NC16-17_1
export MOIRAI_USER=nanoCAGE2
export MOIRAI_PROJECT=Arnaud
export GROUP_SHARED=/osc-fs_home/scratch/gmtu
export WORKDIR=.
export GENE_SYMBOLS=/osc-fs_home/scratch/gmtu/annotation/homo_sapiens/gencode
-14/gencode.v14.annotation.genes.bed
export ANNOTATION=/osc-fs_home/scratch/gmtu/annotation/homo_sapiens/100712hg1
9/100712hg19
export PROCESSED_DATA=/osc-fs_home/scratch/moirai/nanoCAGE2/project/Arnaud/NC
16-17_1.CAGEScan_short-reads.20150625154740
```

## Count the reads

```
awk '/raw/ {print $3}' $PROCESSED_DATA/text/summary.txt |
/usr/lib/filo/stats |
grep 'Sum' |
cut -f2 -d':' |
tr -d '[:space:]' |
xargs -0 /usr/bin/printf " # %'d\n"
```

```
## # 4821156
```

```
grep raw $PROCESSED_DATA/text/summary.txt
```

```
## NC16-17_1.ACAGTG.R1 raw 211404
## NC16-17_1.ACTTGA.R1 raw 189074
## NC16-17_1.ATCACG.R1 raw 544817
## NC16-17_1.CAGATC.R1 raw 214188
## NC16-17_1.CGATGT.R1 raw 490410
## NC16-17_1.CTTGTA.R1 raw 308921
## NC16-17_1.GATCAG.R1 raw 167839
## NC16-17_1.GCCAAT.R1 raw 620406
## NC16-17_1.GGCTAC.R1 raw 150422
## NC16-17_1.TAGCTT.R1 raw 200755
## NC16-17_1.TGACCA.R1 raw 386420
## NC16-17_1.TTAGGC.R1 raw 368814
## NC16-17_1.Undetermined.R1 raw 967686
```

## Analysis with R

```
library(oscr) # See https://github.com/charles-plessy/oscr for oscr.  
if (compareVersion(sessionInfo()$otherPkgs$oscr$Version,'0.1.1') < 0) stop('Outdated version of oscr.')
```

```
library(smallCAGEqc) # See https://github.com/charles-plessy/smallCAGEqc for smallCAGEqc.  
if (compareVersion(sessionInfo()$otherPkgs$smallCAGEqc$Version,'0.6.0') < 0) stop('Outdated version of smallCAGEqc')
```

```
library(vegan)
```

```
## Loading required package: permute  
## Loading required package: lattice  
## This is vegan 2.0-10
```

```
library(ggplot2)  
library(pvclust)
```

## Load data

```
l2_NC17 <- read.osc(paste(LIBRARY,'l2','gz',sep='.'), drop.coord=T, drop.norm=T)  
  
colnames(l2_NC17) <- sub('raw.NC16.17_1.17', 'NC17', colnames(l2_NC17))  
  
colSums(l2_NC17)
```

```
## NC17_HeLa_10PS_A NC17_HeLa_10PS_B NC17_HeLa_10PS_C NC17_HeLa_20PS1_A NC
17_HeLa_20PS1_B NC17_HeLa_20PS1_C
##          31006          29327          34781          29549
          18858          18469
## NC17_HeLa_20PS2_A NC17_HeLa_20PS2_B NC17_HeLa_20PS2_C NC17_HeLa_20PS3_A NC
17_HeLa_20PS3_B NC17_HeLa_20PS3_C
##          23579          15882          18592          26289
          15389          15712
## NC17_HeLa_PS_A NC17_HeLa_PS_B NC17_HeLa_PS_C NC17_HeLa_RanN6_A NC
17_HeLa_RanN6_B NC17_HeLa_RanN6_C
##          29038          21308          29123          44255
          17650          21824
## NC17_THP1_10PS_A NC17_THP1_10PS_B NC17_THP1_10PS_C NC17_THP1_20PS1_A NC
17_THP1_20PS1_B NC17_THP1_20PS1_C
##          26158          19394          28814          17733
          14452          19870
## NC17_THP1_20PS2_A NC17_THP1_20PS2_B NC17_THP1_20PS2_C NC17_THP1_20PS3_A NC
17_THP1_20PS3_B NC17_THP1_20PS3_C
##          19562          11486          21205          23229
          21447          17429
## NC17_THP1_PS_A NC17_THP1_PS_B NC17_THP1_PS_C NC17_THP1_RanN6_A NC
17_THP1_RanN6_B NC17_THP1_RanN6_C
##          24370          18173          20788          20236
          14661          22048
```

## Normalization number of read per sample: l2.sub ; libs\$genes.sub

In all the 3 libraries used, one contain only few reads tags. The smallest one has 8,708 counts. In order to make meaningful comparisons, all of them are subsapled to 8700 counts.

```
l2.sub1 <- t(rrarefy(t(l2_NC17),min(8700)))
colSums(l2.sub1)
```

```
## NC17_HeLa_10PS_A NC17_HeLa_10PS_B NC17_HeLa_10PS_C NC17_HeLa_20PS1_A NC
17_HeLa_20PS1_B NC17_HeLa_20PS1_C
##          8700          8700          8700          8700
          8700          8700
## NC17_HeLa_20PS2_A NC17_HeLa_20PS2_B NC17_HeLa_20PS2_C NC17_HeLa_20PS3_A NC
17_HeLa_20PS3_B NC17_HeLa_20PS3_C
##          8700          8700          8700          8700
          8700          8700
## NC17_HeLa_PS_A NC17_HeLa_PS_B NC17_HeLa_PS_C NC17_HeLa_RanN6_A NC
17_HeLa_RanN6_B NC17_HeLa_RanN6_C
##          8700          8700          8700          8700
          8700          8700
## NC17_THP1_10PS_A NC17_THP1_10PS_B NC17_THP1_10PS_C NC17_THP1_20PS1_A NC
17_THP1_20PS1_B NC17_THP1_20PS1_C
##          8700          8700          8700          8700
          8700          8700
## NC17_THP1_20PS2_A NC17_THP1_20PS2_B NC17_THP1_20PS2_C NC17_THP1_20PS3_A NC
17_THP1_20PS3_B NC17_THP1_20PS3_C
##          8700          8700          8700          8700
          8700          8700
## NC17_THP1_PS_A NC17_THP1_PS_B NC17_THP1_PS_C NC17_THP1_RanN6_A NC
17_THP1_RanN6_B NC17_THP1_RanN6_C
##          8700          8700          8700          8700
          8700          8700
```

## Moirai statistics

Load the QC data produced by the Moirai workflow with which the libraries were processed. Sort in the same way as the l1 and l2 tables, to allow for easy addition of columns.

```
libs <- loadLogs('moirai')
```

## Number of clusters

Count the number of unique L2 clusters per libraries after subsampling, and add this to the QC table. Each subsampling will give a different result, but the mean result can be calculated by using the `rarefy` function at the same scale as the subsampling.

```
libs["l2.sub1"] <- colSums(l2.sub1 > 0)
libs["l2.sub1.exp"] <- rarefy(t(l2_NC17), min(colSums(l2_NC17)))
```

## Richness

Richness should also be calculated on the whole data.

```
libs["r100.l2"] <- rarefy(t(l2_NC17),100)
```

```
boxplot(data=libs, r100.l2 ~ group, ylim=c(92,100), las=1)
```

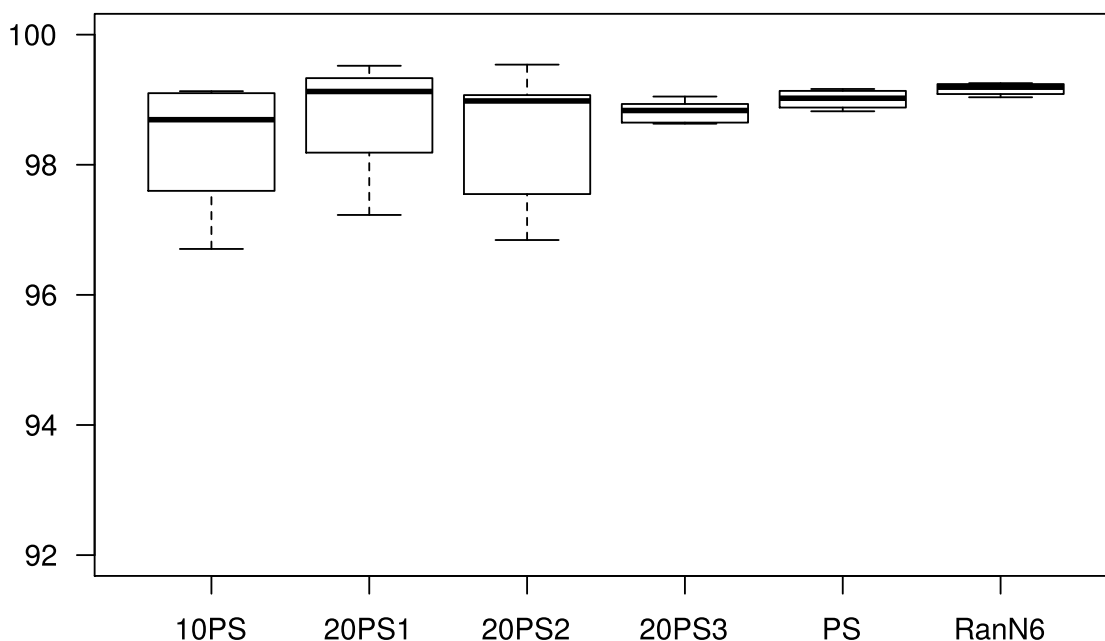

## Hierarchical annotation

Differences of sampling will not bias distort the distribution of reads between annotations, so the non-sampled library is used here.

```
annot.l2 <- read.table(paste(LIBRARY,'l2','annot',sep='.'), head=F, col.names
=c('id', 'feature'), row.names=1)
annot.l2 <- hierarchAnnot(annot.l2)

rownames(libs) <- sub("17_", "NC17_", rownames(libs))

libs <- cbind(libs, t(rowsum(l2_NC17, annot.l2[, 'class'])))
libs$samplename <- sub('17_', 'NC17_', libs$samplename)
```

## Gene symbols used normalisation data

```
genesymbols <- read.table(paste(LIBRARY,'l2','genes',sep='.'), col.names=c("c
luster","symbol"), stringsAsFactors=FALSE)
rownames(genesymbols) <- genesymbols$cluster

g2 <- rowsum(l2_NC17, genesymbols$symbol)
countSymbols <- countSymbols(g2)

libs[colnames(l2_NC17),"genes"] <- (countSymbols)
```

Number of genes detected in sub-sample



```
l2.sub1 <- data.frame(l2.sub1)
g2.sub1 <- rowsum(l2.sub1, genesymbols$symbol)
countSymbols.sub1 <- countSymbols(g2.sub1)
libs[colnames(l2.sub1),"genes.sub1"] <- (countSymbols.sub1)
```

## Comparison transcriptome

```
m2 <- data.frame(
  HeLa_RanN6 = rowMeans(g2[, c('NC17_HeLa_RanN6_A', 'NC17_HeLa_RanN6_B',
'NC17_HeLa_RanN6_C')]),
  HeLa_PS = rowMeans(g2[, c('NC17_HeLa_PS_A', 'NC17_HeLa_PS_B', 'NC17_HeLa_PS
_C')]),
  HeLa_20PS3 = rowMeans(g2[, c('NC17_HeLa_20PS3_A', 'NC17_HeLa_20PS3_B', 'NC1
7_HeLa_20PS3_C')]),
  HeLa_20PS1 = rowMeans(g2[, c('NC17_HeLa_20PS1_A', 'NC17_HeLa_20PS1_B', 'NC1
7_HeLa_20PS1_C')]),
  HeLa_20PS2 = rowMeans(g2[, c('NC17_HeLa_20PS2_A', 'NC17_HeLa_20PS2_B', 'NC1
7_HeLa_20PS2_C')]),
  HeLa_10PS = rowMeans(g2[, c('NC17_HeLa_10PS_A', 'NC17_HeLa_10PS_B', 'NC17_H
eLa_10PS_C')]),
  THP1_RanN6 = rowMeans(g2[, c('NC17_THP1_RanN6_A', 'NC17_THP1_RanN6_B',
'NC17_THP1_RanN6_C')]),
  THP1_PS = rowMeans(g2[, c('NC17_THP1_PS_A', 'NC17_THP1_PS_B', 'NC17_THP1_PS
_C')]),
  THP1_20PS3 = rowMeans(g2[, c('NC17_THP1_20PS3_A', 'NC17_THP1_20PS3_B', 'NC1
7_THP1_20PS3_C')]),
  THP1_20PS1 = rowMeans(g2[, c('NC17_THP1_20PS1_A', 'NC17_THP1_20PS1_B', 'NC1
7_THP1_20PS1_C')]),
  THP1_20PS2 = rowMeans(g2[, c('NC17_THP1_20PS2_A', 'NC17_THP1_20PS2_B', 'NC1
7_THP1_20PS2_C')]),
  THP1_10PS = rowMeans(g2[, c('NC17_THP1_10PS_A', 'NC17_THP1_10PS_B', 'NC17_T
HP1_10PS_C')])
)
```

```
results <- pvclust(m2)
```

```
## Bootstrap (r = 0.5)... Done.
## Bootstrap (r = 0.6)... Done.
## Bootstrap (r = 0.7)... Done.
## Bootstrap (r = 0.8)... Done.
## Bootstrap (r = 0.9)... Done.
## Bootstrap (r = 1.0)... Done.
## Bootstrap (r = 1.1)... Done.
## Bootstrap (r = 1.2)... Done.
## Bootstrap (r = 1.3)... Done.
## Bootstrap (r = 1.4)... Done.
```

```
plot(results)
pvrect(results, alpha=0.95)
```

### Cluster dendrogram with AU/BP values (%)

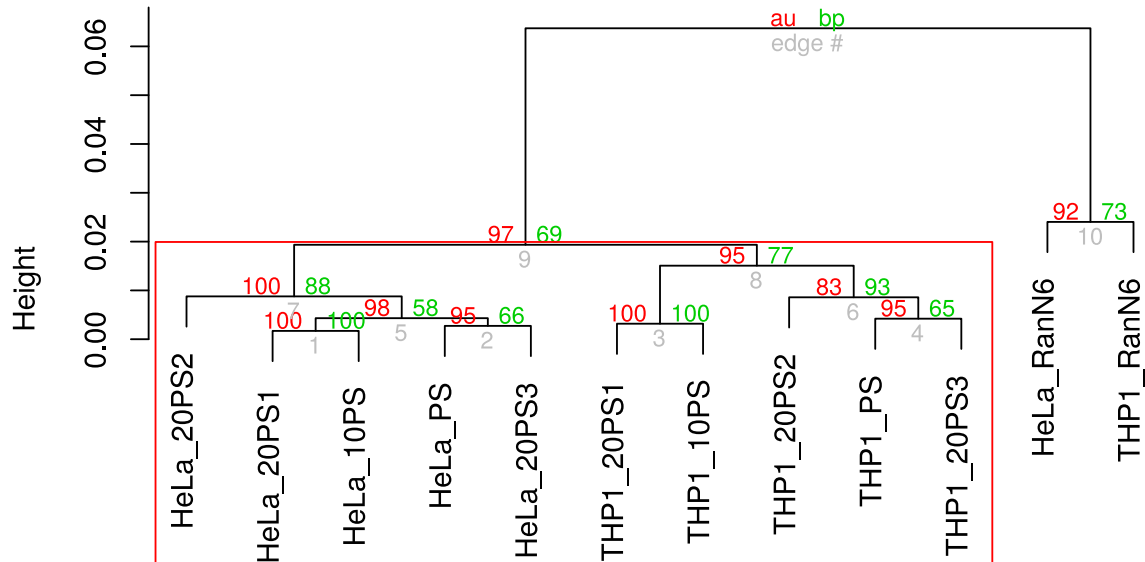

Distance: correlation  
Cluster method: average

### Table record

save the different tables produced for later analysis

```
write.table(l2_NC17, "l2_NC17_1.txt", sep = "\t", quote=FALSE)
write.table(l2.sub1, "l2.sub1_NC17_1.txt", sep = "\t", quote=FALSE)
write.table(g2.sub1, 'g2.sub1_NC17_1.txt', sep="\t", quote=F)
write.table(libs, 'libs_NC17_1.txt', sep="\t", quote=F)
write.table(m2, "m2_NC17_1.txt", sep = "\t", quote = FALSE)
```

# Analyze of the 3 experiments

## Analysis with R

### Configuration

```
library(oscR) # See https://github.com/charles-plessy/oscR
if (compareVersion(sessionInfo()$otherPkgs$oscR$Version, '0.1.1') < 0)
  stop('Out of date oscR library')

library(smallCAGEqc) # See https://github.com/charles-plessy/smallCAGEqc
if (compareVersion(sessionInfo()$otherPkgs$smallCAGEqc$Version, '0.6.0') < 0)
  stop('Out of date smallCAGEqc library')

library(gdata)
```

```
## gdata: read.xls support for 'XLS' (Excel 97-2004) files ENABLED.
##
## gdata: read.xls support for 'XLSX' (Excel 2007+) files ENABLED.
##
## Attaching package: 'gdata'
##
## The following object is masked from 'package:stats':
##
##   nobs
##
## The following object is masked from 'package:utils':
##
##   object.size
```

```
library(vegan)
```

```
## Loading required package: permute
## Loading required package: lattice
## This is vegan 2.0-10
```

```
library(ggplot2)
```

### Load the data

```
libs_NC12 <- read.table("libs_NC12_1.txt", sep="\t", head=T)
libs_NCKi <- read.table("libs_NCKi_1.txt", sep="\t", head=T)
libs_NC17 <- read.table("libs_NC17_1.txt", sep="\t", head=T)
```

## Merge 3 tables

The data coming from the 3 experiments are merged in one table to analyzed them together

```
rownames(libs_NC12) <- sub('NC12.', 'NC12_', rownames(libs_NC12))
```

```
libs <- rbind(libs_NC12, libs_NC17, libs_NCKi)
```

## Add the celltype

```
libs$celltype <- libs$samplename  
libs$celltype <- sub('NC. _', '', libs$celltype)  
libs$celltype <- sub('_.*', '', libs$celltype)  
libs$celltype <- factor(libs$celltype)
```

## Figure S2

Modification of the table libs (group by triplicates)

```
libs2 <- libs  
libs2$group <-libs2$samplename  
libs2$group <- sub('_.$', '', libs2$group)  
libs2$group <- factor(libs2$group)
```

```
plotAnnot(libs2, 'all', 'pseudo-random primers') + theme_bw()
```

```
## Using group as id variables  
## Using group as id variables
```

```
## Warning: Stacking not well defined when ymin != 0
```

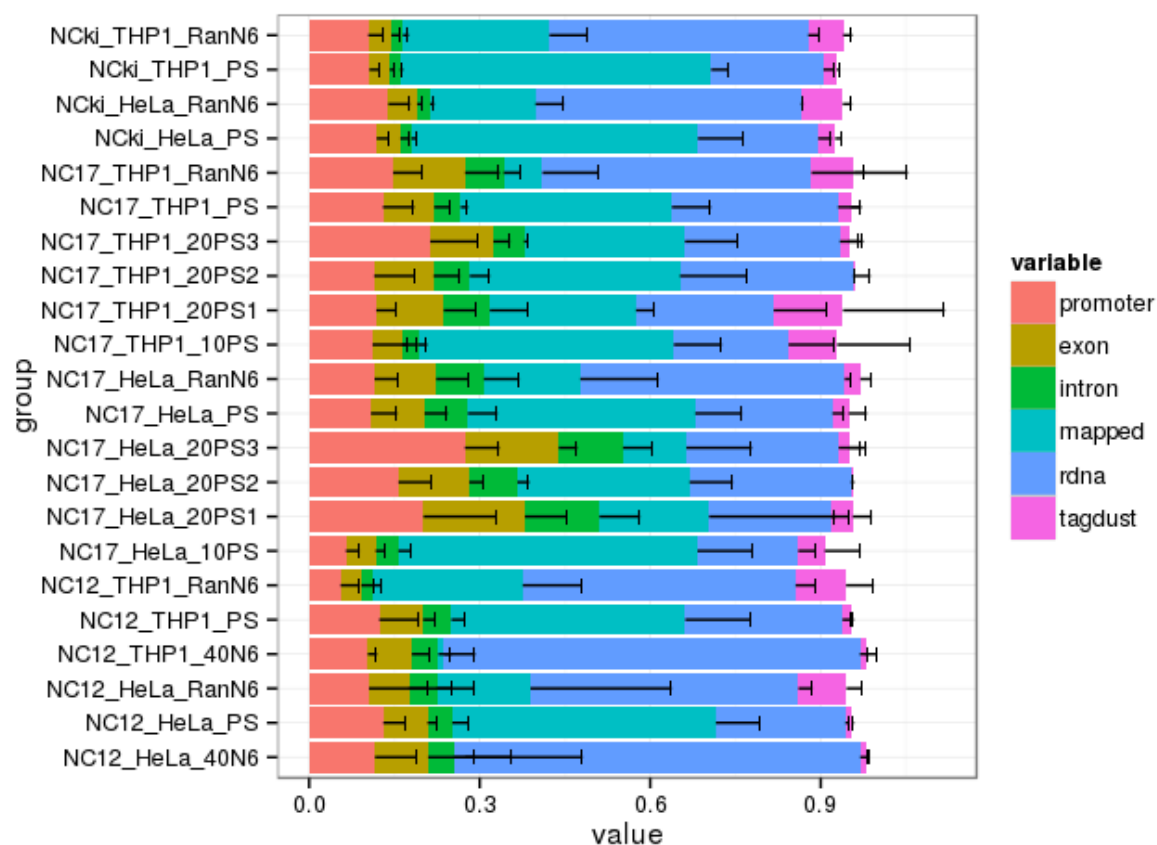

```
libs <- libs[grepl('_RanN6|_PS|_40N6', libs$samplename, value=T),]
libs <- drop.levels(libs)

write.table(libs, "libs.txt", sep="\t", quote=F)
```

## Impact rDNA and artefacts

Calculate means by triplicate

```
libm <- with (libs
, data.frame(samplename, group, celltype
, promoter = promoter / extracted
, exon = exon / extracted
, intron = intron/extracted
, unknown = unknown / extracted
, rDNA = rdna / extracted
, artefacts = tagdust / extracted
))
libm$triplicates <- sub('_.$', '', libm$samplename)
libm <- aggregate(libm[,c('rDNA','artefacts')], list(libm$triplicates), mean)
libm$artefact1000 <- (libm$artefacts)*1000
libm$rDNA1000 <- (libm$rDNA)*1000
libm$group <- libm$Group.1
libm$group <- sub('NC.._', '', libm$group)
```

Draw graph

```
dotsize <- mean(libm$artefact1000) /5
p <- ggplot(libm, aes(y=artefact1000, x=group)) +
  stat_summary(fun.y=mean, fun.ymin=mean, fun.ymax=mean,
  geom="crossbar", color="gray") +
  geom_dotplot(aes(fill=group), binaxis='y', binwidth=1,
  dotsize=dotsize, stackdir='center') +
  theme_bw() +
  theme(axis.text.x = element_text(size=13, angle=90)) +
  theme(axis.text.y = element_text(size=13)) +
  theme(axis.title.x = element_blank())+
  theme(axis.title.y = element_text(size=14))+
  scale_y_continuous(breaks =c(0, 50, 100, 150, 200), limits= c(0,200), lab
  els=c("0", "0.05", "0.1", "0.15", "0.2")) +
  ylab("aretfacts / extracted")
p + theme(legend.position="none")
```

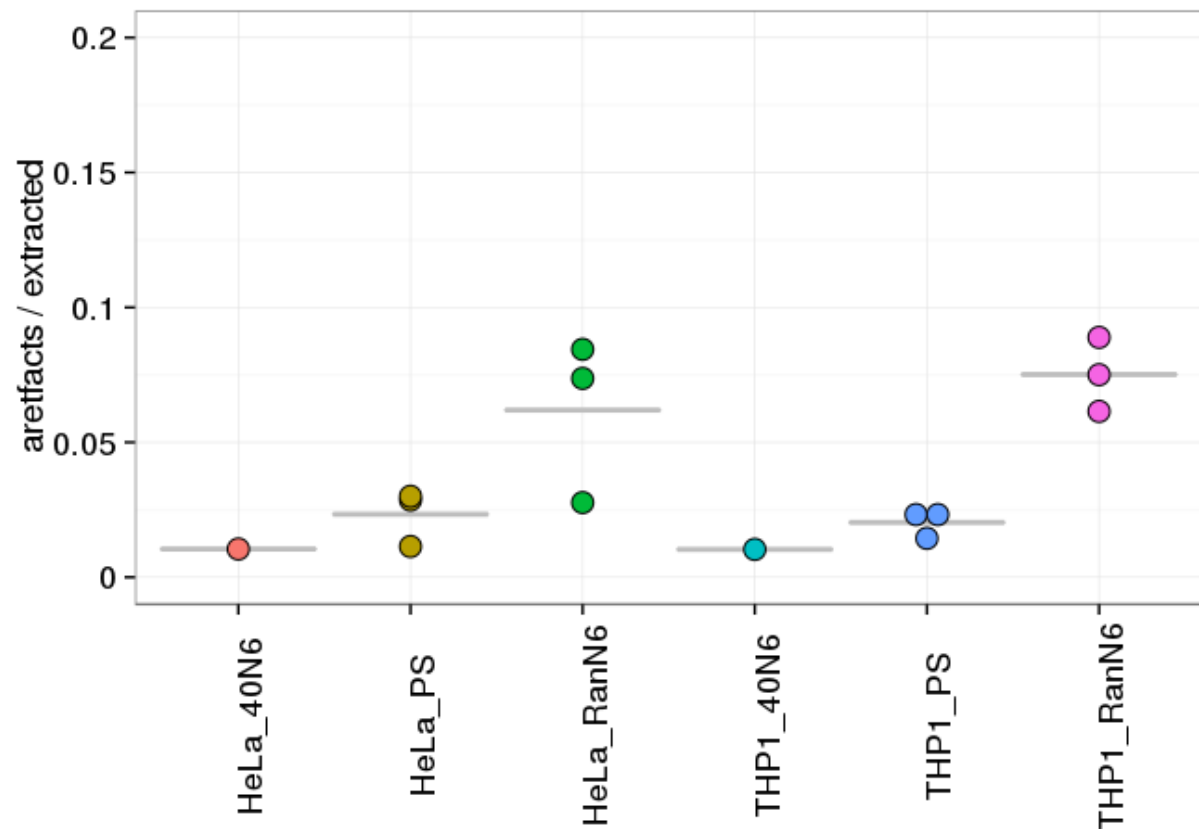

```
dotsize <- mean(libm$rDNA1000)/10
p <- ggplot(libm, aes(y=rDNA1000, x=group)) +
  stat_summary(fun.y=mean, fun.ymin=mean, fun.ymax=mean,
  geom="crossbar", color="gray") +
  geom_dotplot(aes(fill=group), binaxis='y', binwidth=1,
  dotsize=dotsize, stackdir='center') +
  theme_bw() +
  theme(axis.text.x = element_text(size=13, angle=90)) +
  theme(axis.text.y = element_text(size=13)) +
  theme(axis.title.x = element_blank())+
  theme(axis.title.y = element_text(size=14))+
  scale_y_continuous(limits=c(0,900), breaks =c(0, 200, 400, 600, 800), lab
  els=c("0", "0.2", "0.4", "0.6", "0.8")) +
  ylab("rDNA / extracted")
p + theme(legend.position="none")
```

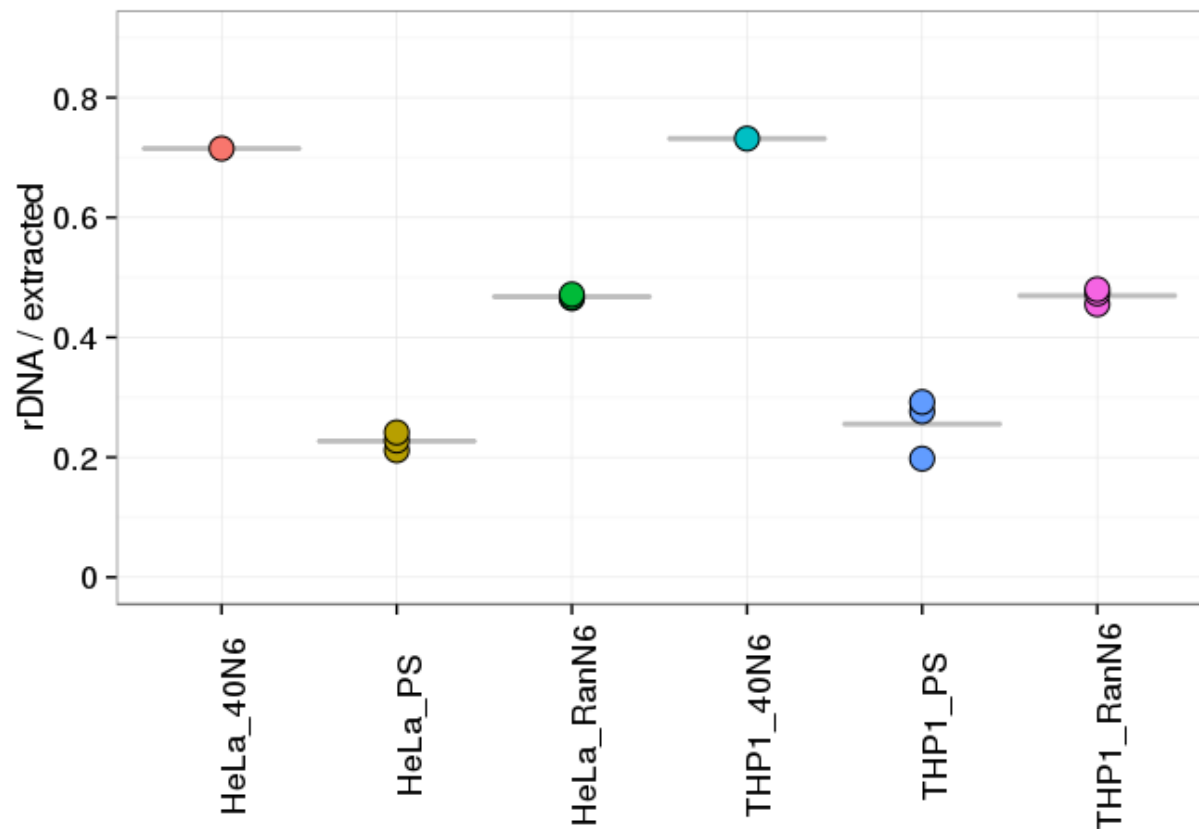

Numbers of genes: percentage

```
genes_percentage <- libs[,c('samplename', 'group', 'genes.sub1')]
genes_percentage$group1 <- genes_percentage$samplename
genes_percentage$group1 <- sub('_.$', '', genes_percentage$group1)
genes_percentage$group1 <- factor(genes_percentage$group1)
genes_percentage <- tapply(genes_percentage$genes.sub1, genes_percentage$group1, mean)

genes_percentage <- sapply(
  c("NC12_HeLa", "NC12_THP1", "NC17_HeLa", "NC17_THP1", "NCKi_HeLa", "NCKi_THP1"),
  function(experiment) genes_percentage[grepl(experiment, names(genes_percentage))] / genes_percentage[paste0(experiment, "_RanN6")] * 100
)
genes_percentage <- unlist(genes_percentage)
names(genes_percentage) <- sub(".*\\.", "", names(genes_percentage))
```

```
genes_percentage <- data.frame(genes_percentage)
genes_percentage$group <- rownames(genes_percentage)
genes_percentage$group <- sub('NC.._', '', genes_percentage$group)
```

```
dotsize <- mean(genes_percentage$genes_percentage) / 110
p <- ggplot(genes_percentage, aes(x=group, y=genes_percentage)) +
  stat_summary(fun.y=mean, fun.ymin=mean, fun.ymax=mean,
  geom="crossbar", color="gray") +
  geom_dotplot(aes(fill=group), binaxis='y', binwidth=1,
  dotsize=dotsize, stackdir='center') +
  theme_bw() +
  theme(axis.text.x = element_text(size=14, angle=90)) +
  theme(axis.text.y = element_text(size=14)) +
  theme(axis.title.y = element_blank()) +
  theme(axis.title.x = element_text(size=14))+
  ylim(90,120) +
  ylab("percentage of genes detected")
p + guides(col = guide_legend(nrow = 8))
```



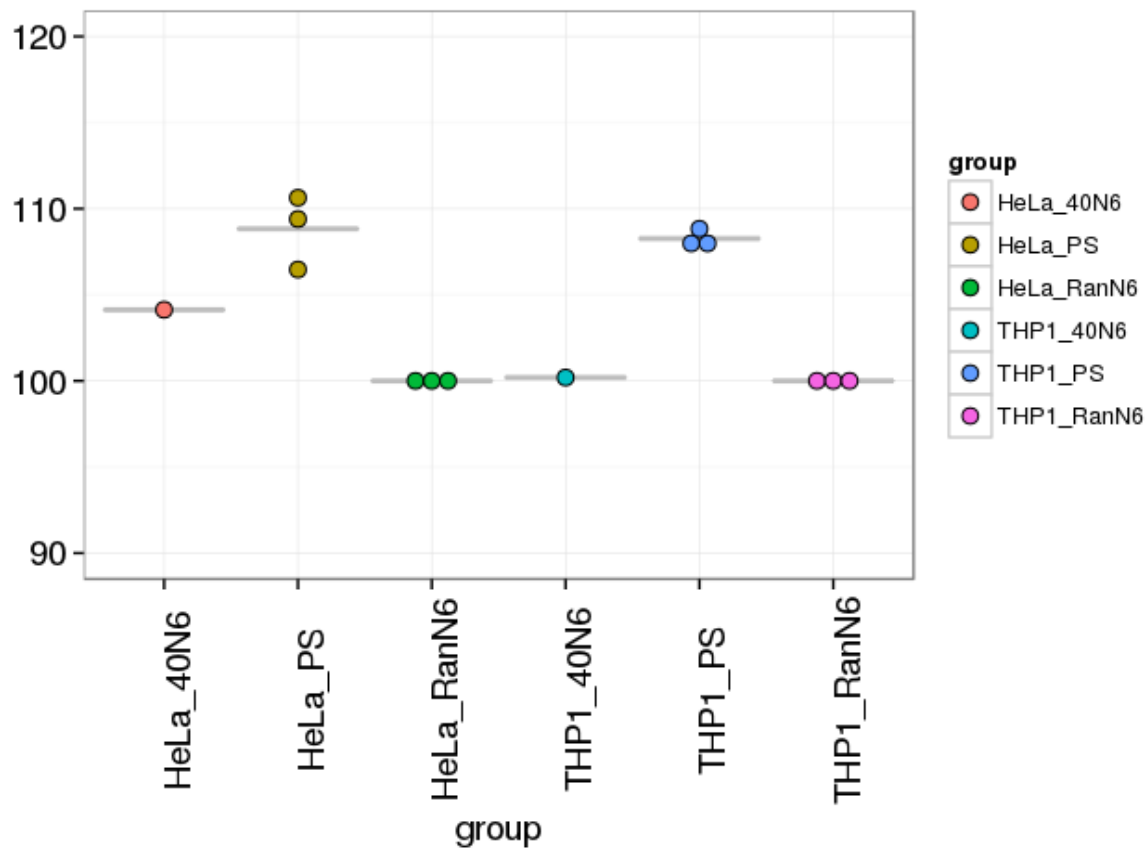

## Transcriptome analysis

Load the data

```
g2_NC12 <- read.table('g2.sub1_NC12_1.txt', sep="\t", head=T)
g2_NC17 <- read.table('g2.sub1_NC17_1.txt', sep="\t", head=T)
g2_NCKi <- read.table('g2.sub1_NCKi_1.txt', sep="\t", head=T)
```

Create a new table

```
g2 <- merge(g2_NC12, g2_NC17, by='row.names', all=T)

rownames(g2) <- g2$Row.names
g2 <- g2[,-1]
g2 <- merge(g2,g2_NCKi, by='row.names', all=T)

rownames(g2) <- g2$Row.names
g2 <- g2[,-1]

g2[is.na(g2)] <- 0

g2b <- g2[-1,]
```

```
RanN6_HeLa = c('NC12.HeLa_RanN6_A', 'NC12.HeLa_RanN6_B', 'NC12.HeLa_RanN6_C',
              , 'NC17_HeLa_RanN6_A', 'NC17_HeLa_RanN6_B', 'NC17_HeLa_RanN6_C'
              , 'NCKi_HeLa_RanN6_A', 'NCKi_HeLa_RanN6_B', 'NCKi_HeLa_RanN6_C')

PS_HeLa = c('NC12.HeLa_PS_A', 'NC12.HeLa_PS_B', 'NC12.HeLa_PS_C'
            , 'NC17_HeLa_PS_A', 'NC17_HeLa_PS_B', 'NC17_HeLa_PS_C'
            , 'NCKi_HeLa_PS_A', 'NCKi_HeLa_PS_B', 'NCKi_HeLa_PS_C')

RanN6_THP1 = c('NC12.TH1P1_RanN6_A', 'NC12.TH1P1_RanN6_B', 'NC12.TH1P1_RanN6_C'
               , 'NC17_TH1P1_RanN6_A', 'NC17_TH1P1_RanN6_B', 'NC17_TH1P1_RanN6_C'
               , 'NCKi_TH1P1_RanN6_A', 'NCKi_TH1P1_RanN6_B', 'NCKi_TH1P1_RanN6_C')

PS_THP1 = c('NC12.TH1P1_PS_A', 'NC12.TH1P1_PS_B', 'NC12.TH1P1_PS_C'
             , 'NC17_TH1P1_PS_A', 'NC17_TH1P1_PS_B', 'NC17_TH1P1_PS_C'
             , 'NCKi_TH1P1_PS_A', 'NCKi_TH1P1_PS_B', 'NCKi_TH1P1_PS_C')
```

```
mx <- function(DATA)
  {data.frame( HeLa_RanN6 = rowMeans(DATA[,RanN6_HeLa])
              , HeLa_pseudoRan = rowMeans(DATA[,PS_HeLa])
              , THP1_RanN6 = rowMeans(DATA[,RanN6_THP1])
              , THP1_pseudoRan = rowMeans(DATA[,PS_THP1]))}

m2 <- mx(g2)

write.table(m2, "m2.txt", sep = "\t", quote = FALSE)
```

```
panel.cor <- function(x, y, digits=2, prefix="", cex.cor, ...)
  {
    usr <- par("usr"); on.exit(par(usr))
    par(usr = c(0, 1, 0, 1))
    r <- abs(cor(x, y))
    txt <- format(c(r, 0.123456789), digits=digits)[1]
    txt <- paste(prefix, txt, sep="")
    if(missing(cex.cor)) cex.cor <- 0.8/strwidth(txt)
    text(0.5, 0.5, txt, cex = cex.cor * r)
  }

pointsUnique <- function(x,y,...)
  points(unique(data.frame(x,y)),...)

pairPanel <- function(dataframe, title)
  pairs( dataframe
        , lower.panel=panel.cor
        , upper.panel=pointsUnique
        , main=title
        , pch='.', cex=4)
```

```
pairPanel(log(m2+1), 'pseudo-random primers')
```

## pseudo-random primers

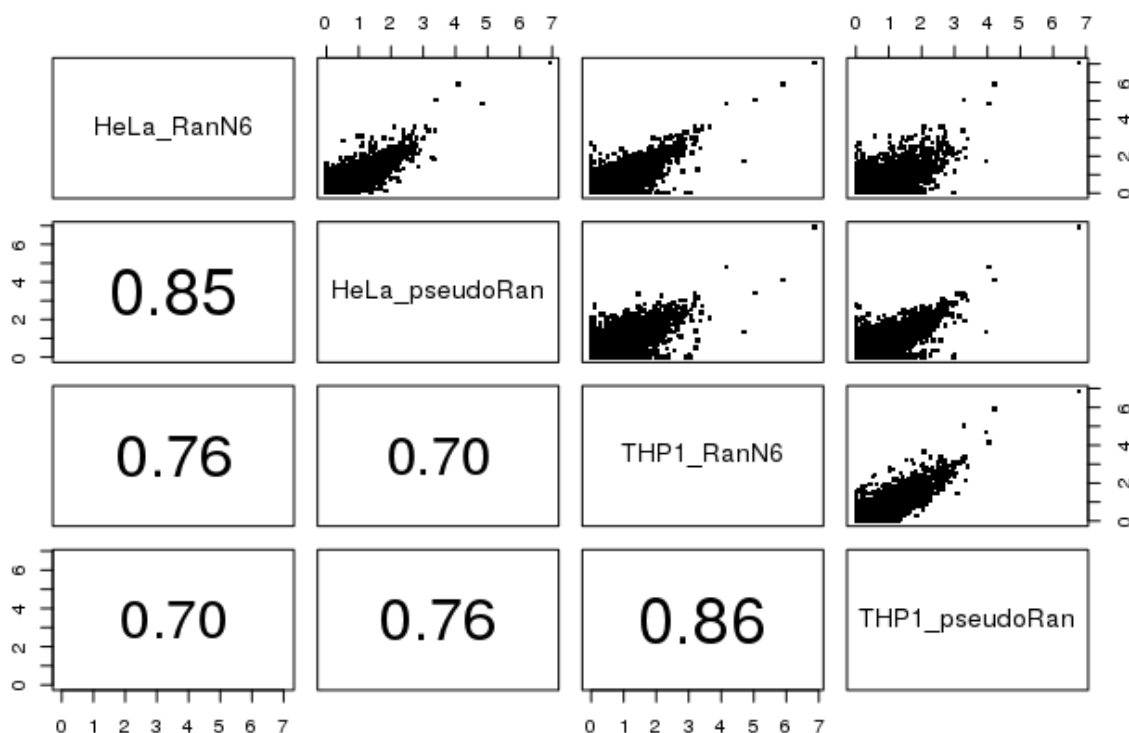

```
plotFoldChange <- function (DATA, COL, MAX, FUN=points, ...) {
  with( DATA[rowSums(DATA) > MAX,] +1
    , FUN( HeLa_RanN6      / THP1_RanN6
          , HeLa_pseudoRan / THP1_pseudoRan
          , col=COL
          , pch='.'
          , cex=5
          , ... ))
}
```

```
plotFoldChangeGrays <- function (DATA, TITLE, xlab="Standard N6 random primers",
  ylab="Pseudo-random primers" ) {
  plotFoldChange( DATA,'gray90', 0
    , plot, log='xy', main=TITLE
    , xlab=xlab, ylab=ylab)
  plotFoldChange(DATA, 'gray70', 10)
  plotFoldChange(DATA, 'gray50', 20)
  plotFoldChange(DATA, 'gray30', 30)
  plotFoldChange(DATA, 'gray10', 40)
  legend( 'bottomright'
    , legend=c(0, 10, 20, 30, 40)
    , col=c('gray90', 'gray70', 'gray50', 'gray30', 'gray10')
    , pch=16, title='min expr.')
}
```

```
u2 <- unique(m2)
```

Draw graphs

```
plotFoldChangeGrays(u2, "HeLa - THP-1 fold changes")
```

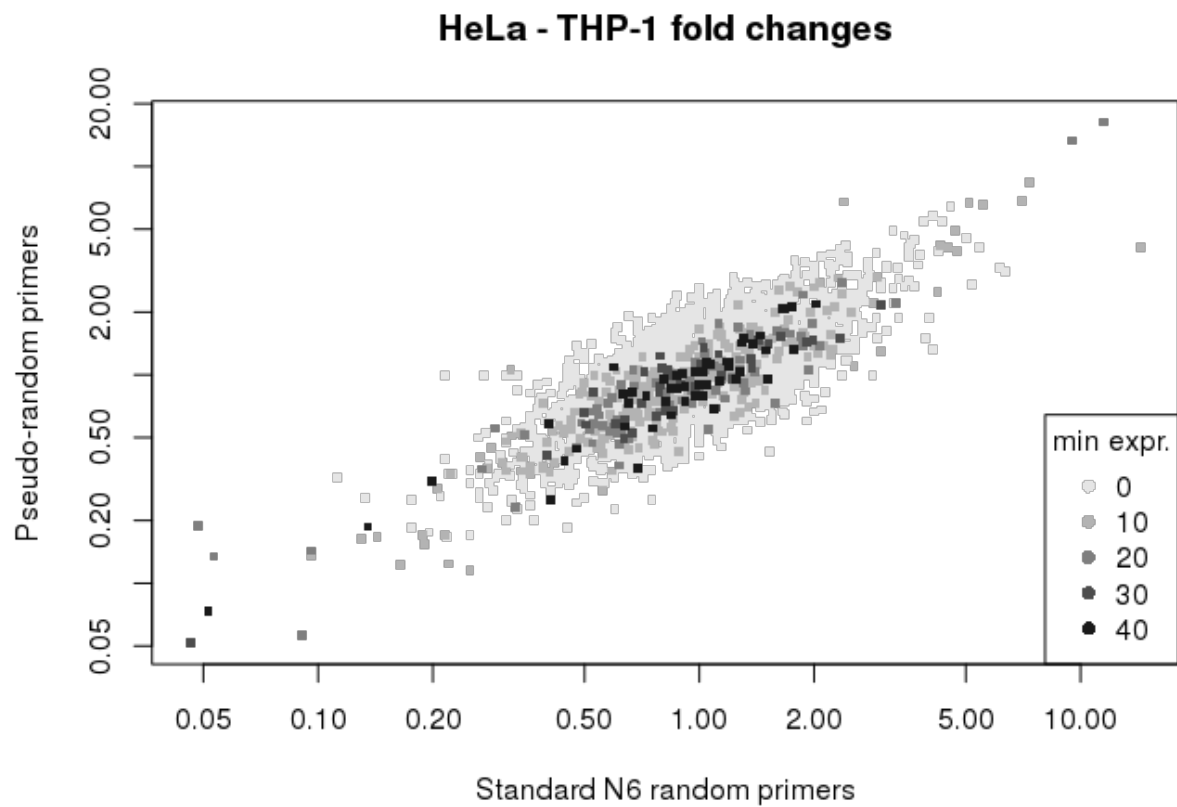

```
plotFoldChange( u2, 'gray10', 0  
                , plot, log='xy', main="HeLa - THP-1 fold changes"  
                , xlab="Standard N6 random primers", ylab="Pseudo-random primers")
```

## HeLa - THP-1 fold changes

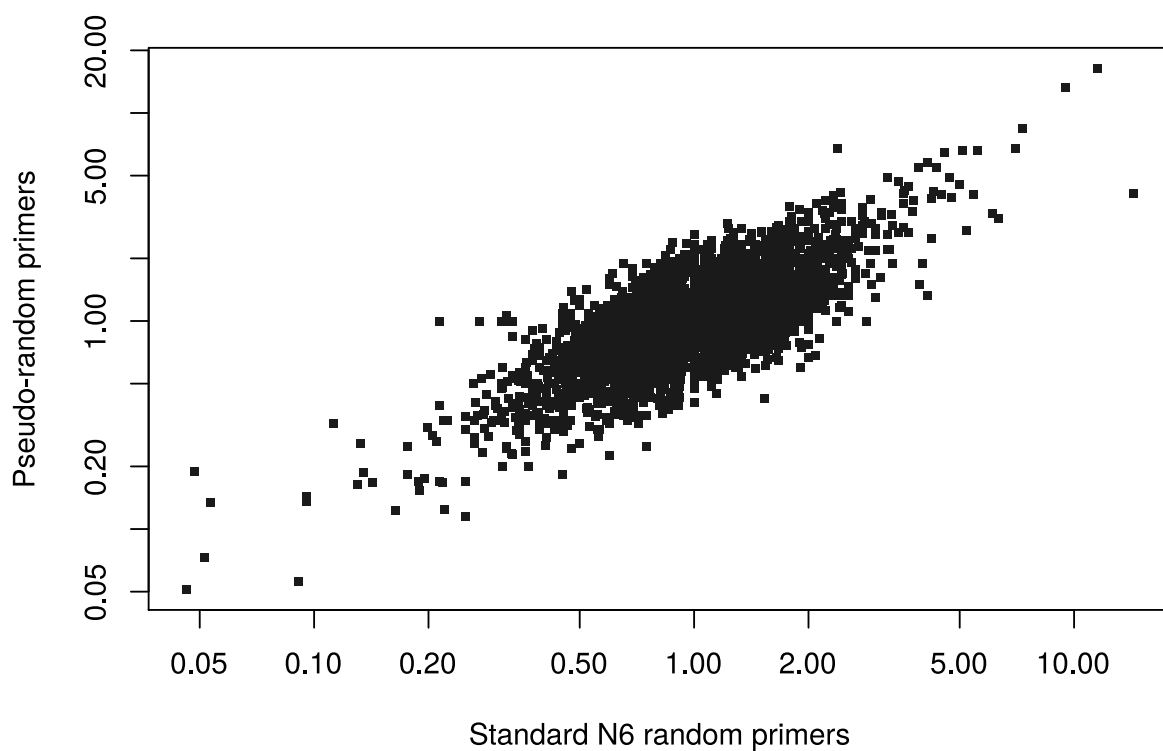

# Statistic tests

## statistic tests about sequences coming from ribosomal RNA

Regarding the PS and RanN6 set, we use a paired t.test as the the results come from 3 independents experiments.

```
rDNA <- read.table('rDNA.csv', sep=",", head=T)
```

```
## Warning in read.table("rDNA.csv", sep = ",", head = T): incomplete final line found by readTableHeader on 'rDNA.csv'
```

```
rDNA
```

```
##   experiments HeLa_40N6   HeLa_PS HeLa_RanN6 THP1_40N6   THP1_PS THP1_RanN
6
## 1          NC12 0.7149618 0.2279513 0.4715841 0.7314974 0.2765081 0.480080
5
## 2          NC17          NA 0.2413637 0.4651863          NA 0.2921605 0.473343
9
## 3          Ncki          NA 0.2116392 0.4669319          NA 0.1976666 0.455164
1
```

```
t.test(rDNA$HeLa_PS, rDNA$HeLa_RanN6, paired = T)
```

```
##
## Paired t-test
##
## data:  rDNA$HeLa_PS and rDNA$HeLa_RanN6
## t = -26.2275, df = 2, p-value = 0.001451
## alternative hypothesis: true difference in means is not equal to 0
## 95 percent confidence interval:
## -0.2804387 -0.2013934
## sample estimates:
## mean of the differences
## -0.2409161
```

```
t.test(rDNA$THP1_PS, rDNA$THP1_RanN6, paired = T)
```

```
##
## Paired t-test
##
## data: rDNA$THP1_PS and rDNA$THP1_RanN6
## t = -9.4525, df = 2, p-value = 0.01101
## alternative hypothesis: true difference in means is not equal to 0
## 95 percent confidence interval:
## -0.3115324 -0.1166364
## sample estimates:
## mean of the differences
## -0.2140844
```

```
rDNA_40N6 <- read.table('rDNA_40N6.csv', sep=",", head=T)
```

```
## Warning in read.table("rDNA_40N6.csv", sep = ",", head = T): incomplete final line found by readTableHeader on
## 'rDNA_40N6.csv'
```

```
rDNA_40N6
```

```
##   experiments HeLa_40N6   HeLa_PS HeLa_RanN6 THP1_40N6   THP1_PS THP1_RanN
6
## 1      NC12_A 0.6971786 0.2241748  0.4644208 0.6973555 0.2642123  0.451782
0
## 2      NC12_B 0.7209952 0.2349407  0.4991978 0.7501979 0.2956299  0.518855
2
## 3      NC12_C 0.7267116 0.2247385  0.4511338 0.7469388 0.2696820  0.469604
3
```

Regarding the 40N6 set, we can not use the paired test as only one experiment has been performed. Thus, we use the 3 replicats of 1 experiment.

```
t.test(rDNA_40N6$HeLa_RanN6, rDNA_40N6$HeLa_40N6)
```

```
##
## Welch Two Sample t-test
##
## data: rDNA_40N6$HeLa_RanN6 and rDNA_40N6$HeLa_40N6
## t = -14.363, df = 3.375, p-value = 0.0003821
## alternative hypothesis: true difference in means is not equal to 0
## 95 percent confidence interval:
## -0.2940671 -0.1926882
## sample estimates:
## mean of x mean of y
## 0.4715841 0.7149618
```

```
t.test(rDNA_40N6$HeLa_PS, rDNA_40N6$HeLa_40N6)
```

```
##  
## Welch Two Sample t-test  
##  
## data: rDNA_40N6$HeLa_PS and rDNA_40N6$HeLa_40N6  
## t = -50.2252, df = 2.586, p-value = 6.162e-05  
## alternative hypothesis: true difference in means is not equal to 0  
## 95 percent confidence interval:  
## -0.5208657 -0.4531552  
## sample estimates:  
## mean of x mean of y  
## 0.2279513 0.7149618
```

```
t.test(rDNA_40N6$THP1_RanN6, rDNA_40N6$THP1_40N6)
```

```
##  
## Welch Two Sample t-test  
##  
## data: rDNA_40N6$THP1_RanN6 and rDNA_40N6$THP1_40N6  
## t = -9.5392, df = 3.902, p-value = 0.0007598  
## alternative hypothesis: true difference in means is not equal to 0  
## 95 percent confidence interval:  
## -0.3253230 -0.1775109  
## sample estimates:  
## mean of x mean of y  
## 0.4800805 0.7314974
```

```
t.test(rDNA_40N6$THP1_PS, rDNA_40N6$THP1_40N6)
```

```
##  
## Welch Two Sample t-test  
##  
## data: rDNA_40N6$THP1_PS and rDNA_40N6$THP1_40N6  
## t = -23.1521, df = 3.165, p-value = 0.0001224  
## alternative hypothesis: true difference in means is not equal to 0  
## 95 percent confidence interval:  
## -0.5157285 -0.3942503  
## sample estimates:  
## mean of x mean of y  
## 0.2765081 0.7314974
```

## statistic tests about sequences coming from artefacts

Regarding the PS and RanN6 set, we use a paired t.test as the the results come from 3 independents experiments.

```
artefact <- read.table('artefacts.csv', sep=",", head=T)
```



```
## Warning in read.table("artefacts.csv", sep = ",", head = T): incomplete final line found by readTableHeader on
## 'artefacts.csv'
```

```
artefact
```

```
##   experiments HeLa_40N6   HeLa_PS HeLa_RanN6 THP1_40N6   THP1_PS THP1_
RanN6
## 1          NC12 0.01044525 0.01139030 0.08445126 0.01031001 0.01440960 0.088
87914
## 2          NC17          NA 0.02860542 0.02765798          NA 0.02274970 0.075
05295
## 3          Ncki          NA 0.02998795 0.07369473          NA 0.02369741 0.061
45156
```

```
t.test(artefact$HeLa_PS, artefact$HeLa_RanN6, paired = T)
```

```
##
## Paired t-test
##
## data: artefact$HeLa_PS and artefact$HeLa_RanN6
## t = -1.7943, df = 2, p-value = 0.2146
## alternative hypothesis: true difference in means is not equal to 0
## 95 percent confidence interval:
## -0.13118278 0.05396924
## sample estimates:
## mean of the differences
## -0.03860677
```

```
t.test(artefact$THP1_PS, artefact$THP1_RanN6, paired = T)
```

```
##
## Paired t-test
##
## data: artefact$THP1_PS and artefact$THP1_RanN6
## t = -5.1377, df = 2, p-value = 0.03586
## alternative hypothesis: true difference in means is not equal to 0
## 95 percent confidence interval:
## -0.100771328 -0.008913305
## sample estimates:
## mean of the differences
## -0.05484232
```

Regarding the 40N6 set, we can not use the paired test as only one experiment has been performed. Thus, we use the 3 replicats of 1 experiment.

```
artefact_40N6 <- read.table('artefact_40N6.csv', sep="," , head=T)
```

```
## Warning in read.table("artefact_40N6.csv", sep = ",", head = T): incomplete final line found by readTableHeader on
## 'artefact_40N6.csv'
```

```
artefact_40N6
```

```
##   experiments   HeLa_40N6      HeLa_PS HeLa_RanN6  THP1_40N6      THP1_PS TH
P1_RanN6
## 1      NC12_A 0.014282432 0.014614436 0.08701817 0.01415881 0.019349645 0.
13564309
## 2      NC12_B 0.005714088 0.007657406 0.05647798 0.00548908 0.008236931 0.
03813052
## 3      NC12_C 0.011339241 0.011899050 0.10985765 0.01128215 0.015642227 0.
09286382
```

```
t.test(artefact_40N6$HeLa_RanN6, artefact_40N6$HeLa_40N6)
```

```
##
## Welch Two Sample t-test
##
## data: artefact_40N6$HeLa_RanN6 and artefact_40N6$HeLa_40N6
## t = 4.7241, df = 2.106, p-value = 0.03798
## alternative hypothesis: true difference in means is not equal to 0
## 95 percent confidence interval:
##  0.009740573 0.138271448
## sample estimates:
## mean of x mean of y
## 0.08445126 0.01044525
```

```
t.test(artefact_40N6$HeLa_PS, artefact_40N6$HeLa_40N6)
```

```
##
## Welch Two Sample t-test
##
## data: artefact_40N6$HeLa_PS and artefact_40N6$HeLa_40N6
## t = 0.2928, df = 3.826, p-value = 0.7848
## alternative hypothesis: true difference in means is not equal to 0
## 95 percent confidence interval:
## -0.008178375 0.010068462
## sample estimates:
## mean of x mean of y
## 0.01139030 0.01044525
```

```
t.test(artefact_40N6$THP1_RanN6, artefact_40N6$THP1_40N6)
```

```
##  
## Welch Two Sample t-test  
##  
## data: artefact_40N6$THP1_RanN6 and artefact_40N6$THP1_40N6  
## t = 2.7729, df = 2.033, p-value = 0.1073  
## alternative hypothesis: true difference in means is not equal to 0  
## 95 percent confidence interval:  
## -0.04148839 0.19862666  
## sample estimates:  
## mean of x mean of y  
## 0.08887914 0.01031001
```

```
t.test(artefact_40N6$THP1_PS, artefact_40N6$THP1_40N6)
```

```
##  
## Welch Two Sample t-test  
##  
## data: artefact_40N6$THP1_PS and artefact_40N6$THP1_40N6  
## t = 0.9893, df = 3.777, p-value = 0.3816  
## alternative hypothesis: true difference in means is not equal to 0  
## 95 percent confidence interval:  
## -0.007678089 0.015877266  
## sample estimates:  
## mean of x mean of y  
## 0.01440960 0.01031001
```

## statistic tests about the numbers of genes detected

Regarding the PS and RanN6 set, we use a paired t.test as the the results come from 3 independents experiments.

```
genes <- read.table('genes.csv', sep="," , head=T)
```

```
## Warning in read.table("genes.csv", sep = ",", head = T): incomplete final  
line found by readTableHeader on 'genes.csv'
```

```
genes
```

```
## experiments HeLa_40N6 HeLa_PS HeLa_RanN6 THP1_40N6 THP1_PS THP1_RanN6  
## 1 NC12 104.1283 110.6335 100 100.1942 108.2811 100  
## 2 NC17 NA 106.4641 100 NA 107.6821 100  
## 3 Ncki NA 109.3965 100 NA 108.8293 100
```

```
t.test(genes$HeLa_PS, genes$HeLa_RanN6, paired = T)
```

```
##
## Paired t-test
##
## data: genes$HeLa_PS and genes$HeLa_RanN6
## t = 7.1433, df = 2, p-value = 0.01904
## alternative hypothesis: true difference in means is not equal to 0
## 95 percent confidence interval:
## 3.511913 14.150874
## sample estimates:
## mean of the differences
## 8.831394
```

```
t.test(genes$THP1_PS, genes$THP1_RanN6, paired = T)
```

```
##
## Paired t-test
##
## data: genes$THP1_PS and genes$THP1_RanN6
## t = 24.9454, df = 2, p-value = 0.001603
## alternative hypothesis: true difference in means is not equal to 0
## 95 percent confidence interval:
## 6.83873 9.68958
## sample estimates:
## mean of the differences
## 8.264155
```

Regarding the 40N6 set, we can not use the paired test as only one experiment has been performed. Thus, we use the 3 replicats of 1 experiment.

```
genes_40N6 <- read.table('genes_40N6.csv', sep="," , head=T)
```

```
## Warning in read.table("genes_40N6.csv", sep = ",", head = T): incomplete f
inal line found by readTableHeader on
## 'genes_40N6.csv'
```

```
genes_40N6
```

```
## experiments HeLa_40N6 HeLa_PS HeLa_RanN6 THP1_40N6 THP1_PS THP1_RanN6
## 1 NC12_A 102.3233 108.8375 96.80100 94.68527 106.6037 96.35384
## 2 NC12_B 103.3688 110.0974 103.87812 101.91578 106.1005 102.55143
## 3 NC12_C 106.6929 112.9658 99.32088 103.98164 112.1391 101.09473
```

```
t.test(genes_40N6$HeLa_RanN6, genes_40N6$HeLa_40N6)
```

```
##  
## Welch Two Sample t-test  
##  
## data: genes_40N6$HeLa_RanN6 and genes_40N6$HeLa_40N6  
## t = -1.682, df = 3.391, p-value = 0.1806  
## alternative hypothesis: true difference in means is not equal to 0  
## 95 percent confidence interval:  
## -11.454223 3.197589  
## sample estimates:  
## mean of x mean of y  
## 100.0000 104.1283
```

```
t.test(genes_40N6$HeLa_PS, genes_40N6$HeLa_40N6)
```

```
##  
## Welch Two Sample t-test  
##  
## data: genes_40N6$HeLa_PS and genes_40N6$HeLa_40N6  
## t = 3.621, df = 3.977, p-value = 0.02255  
## alternative hypothesis: true difference in means is not equal to 0  
## 95 percent confidence interval:  
## 1.506129 11.504326  
## sample estimates:  
## mean of x mean of y  
## 110.6335 104.1283
```

```
t.test(genes_40N6$THP1_RanN6, genes_40N6$THP1_40N6)
```

```
##  
## Welch Two Sample t-test  
##  
## data: genes_40N6$THP1_RanN6 and genes_40N6$THP1_40N6  
## t = -0.0574, df = 3.476, p-value = 0.9574  
## alternative hypothesis: true difference in means is not equal to 0  
## 95 percent confidence interval:  
## -10.171798 9.783346  
## sample estimates:  
## mean of x mean of y  
## 100.0000 100.1942
```

```
t.test(genes_40N6$THP1_PS, genes_40N6$THP1_40N6)
```

```
##  
## Welch Two Sample t-test  
##  
## data: genes_40N6$THP1_PS and genes_40N6$THP1_40N6  
## t = 2.3657, df = 3.542, p-value = 0.08558  
## alternative hypothesis: true difference in means is not equal to 0  
## 95 percent confidence interval:  
## -1.90779 18.08153  
## sample estimates:  
## mean of x mean of y  
## 108.2811 100.1942
```

# Targeted reduction of Hemoglobin cDNAs

## Configuration

```
library(plyr)

exportInEnv <- function(X) {
  Name <- X
  Value <- get(X)
  .Internal(Sys.setenv(Name, Value))
  cat( paste0("export ", paste(Name, Value, sep=' '), "\n"))
}

LIBRARY <- 'NC22b'
MOIRAI_USER <- 'nanoCAGE2'
MOIRAI_PROJECT <- 'Arnaud'
GROUP_SHARED <- '/osc-fs_home/scratch/gmtu'
WORKDIR <- '.'
GENE_SYMBOLS <- paste(GROUP_SHARED, 'annotation/homo_sapiens/gencode-14/gen
code.v14.annotation.genes.bed', sep='/')
ANNOTATION <- paste(GROUP_SHARED, 'annotation/homo_sapiens/100712hg19/100
712hg19', sep='/')
PROCESSED_DATA <- dirname( system( paste( 'ls -d /osc-fs_home/scratch/moirai/
',
                                          , MOIRAI_USER
                                          , '/project/'
                                          , MOIRAI_PROJECT
                                          , '/'
                                          , LIBRARY
                                          , '*/Moirai.config'
                                          , sep='')
                              , intern=TRUE)[1])

l_ply( c("LIBRARY", "MOIRAI_USER", "MOIRAI_PROJECT", "GROUP_SHARED"
        , "WORKDIR", "GENE_SYMBOLS", "ANNOTATION", "PROCESSED_DATA")
      , exportInEnv )
```

```
export LIBRARY=NC22b
export MOIRAI_USER=nanoCAGE2
export MOIRAI_PROJECT=Arnaud
export GROUP_SHARED=/osc-fs_home/scratch/gmtu
export WORKDIR=.
export GENE_SYMBOLS=/osc-fs_home/scratch/gmtu/annotation/homo_sapiens/gencode
-14/gencode.v14.annotation.genes.bed
export ANNOTATION=/osc-fs_home/scratch/gmtu/annotation/homo_sapiens/100712hg1
9/100712hg19
export PROCESSED_DATA=/osc-fs_home/scratch/moirai/nanoCAGE2/project/Arnaud/NC
22b.CAGEscan_short-reads.20150625152335
```

Moirai URL: [http://moirai.gsc.riken.jp/osc-fs\\_home/scratch/moirai/nanoCAGE2/project/Arnaud/NC22b.CAGEscan\\_short-reads.20150625152335/NC22b.CAGEscan\\_short-reads.20150625152335.html](http://moirai.gsc.riken.jp/osc-fs_home/scratch/moirai/nanoCAGE2/project/Arnaud/NC22b.CAGEscan_short-reads.20150625152335/NC22b.CAGEscan_short-reads.20150625152335.html) ([http://moirai.gsc.riken.jp/osc-fs\\_home/scratch/moirai/nanoCAGE2/project/Arnaud/NC22b.CAGEscan\\_short-reads.20150625152335/NC22b.CAGEscan\\_short-reads.20150625152335.html](http://moirai.gsc.riken.jp/osc-fs_home/scratch/moirai/nanoCAGE2/project/Arnaud/NC22b.CAGEscan_short-reads.20150625152335/NC22b.CAGEscan_short-reads.20150625152335.html))

## Count the reads

```
awk '/raw/ {print $3}' $PROCESSED_DATA/text/summary.txt |
/usr/lib/filo/stats |
grep 'Sum' |
cut -f2 -d':' |
tr -d '[:space:]' |
xargs -0 /usr/bin/printf " # %'d\n"

grep raw $PROCESSED_DATA/text/summary.txt
```

```
## # 2999748
## NC22b.ACAGTG.R1 raw 181519
## NC22b.ATCACG.R1 raw 211629
## NC22b.CGATGT.R1 raw 82773
## NC22b.GCCAAT.R1 raw 170418
## NC22b.TGACCA.R1 raw 58532
## NC22b.TTAGGC.R1 raw 188190
## NC22b.Undetermined.R1 raw 2106687
```

## Analysis with R

### Configuration



```
library(oscR) # See https://github.com/charles-plessy/oscR for oscR.
if (compareVersion(sessionInfo()$otherPkgs$oscR$Version,'0.1.1') < 0) stop('O
utdated version of oscR.')
library(smallCAGEqc) # See https://github.com/charles-plessy/smallCAGEqc for
smallCAGEqc.
if (compareVersion(sessionInfo()$otherPkgs$smallCAGEqc$Version,'0.6.0') < 0)
stop('Outdated version of smallCAGEqc')
library(vegan)
```

```
## Loading required package: permute
## Loading required package: lattice
## This is vegan 2.0-10
```

```
library(ggplot2)
```

## Load data

```
l1 <- read.osc(paste(LIBRARY,'l1','gz',sep='.'), drop.coord=T, drop.norm=T)
l2 <- read.osc(paste(LIBRARY,'l2','gz',sep='.'), drop.coord=T, drop.norm=T)

colnames(l1) <- sub('raw.NC22b.','',colnames(l1))
colnames(l2) <- sub('raw.NC22b.','',colnames(l2))

colSums(l2)
```

```
## 22_PSHb_A 22_PSHb_B 22_PSHb_C 22_RanN6_A 22_RanN6_B 22_RanN6_C
##      3786      3196      6805      17433      18864      17218
```

```
PSHb <- c('22_PSHb_A', '22_PSHb_B', '22_PSHb_C')
RanN6 <- c('22_RanN6_A', '22_RanN6_B', '22_RanN6_C')
```

## Normalization number of read per sample : libs2.sub

Libraries contain only very few reads tags. The smallest one has 3,191 counts. In order to make meaningful comparisons, all of them are subsampled to 3190 counts.

```
l2.sub <- t(rrarefy(t(l2),3190))

colSums(l2.sub)
```

```
## 22_PSHb_A 22_PSHb_B 22_PSHb_C 22_RanN6_A 22_RanN6_B 22_RanN6_C
##      3190      3190      3190      3190      3190      3190
```

## Moirai statistics

Load the QC data produced by the Moirai workflow with which the libraries were processed. Sort in the same way as the 11 and 12 tables, to allow for easy addition of columns.

```
libs <- loadLogs('moirai')
libs <- libs[colnames(11),]
```

## Number of clusters

Count the number of unique L2 clusters per libraries after subsampling, and add this to the QC table. Each subsampling will give a different result, but the mean result can be calculated by using the `rarefy` function at the same scale as the subsampling.

```
libs["12.sub"] <- colSums(12.sub > 0)
libs["12.sub.exp"] <- rarefy(t(12), min(colSums(12)))
```

## Richness

Richness should also be calculated on the whole data.

```
libs["r100.12"] <- rarefy(t(12),100)
t.test(data=libs, r100.12 ~ group)
```

```
##
## Welch Two Sample t-test
##
## data: r100.12 by group
## t = 13.0614, df = 3.836, p-value = 0.0002544
## alternative hypothesis: true difference in means is not equal to 0
## 95 percent confidence interval:
## 7.645323 11.863046
## sample estimates:
## mean in group PS_Hb mean in group RanN6
## 93.44089 83.68671
```

```
boxplot(data=libs, r100.12 ~ group, ylim=c(80,100), las=1)
```

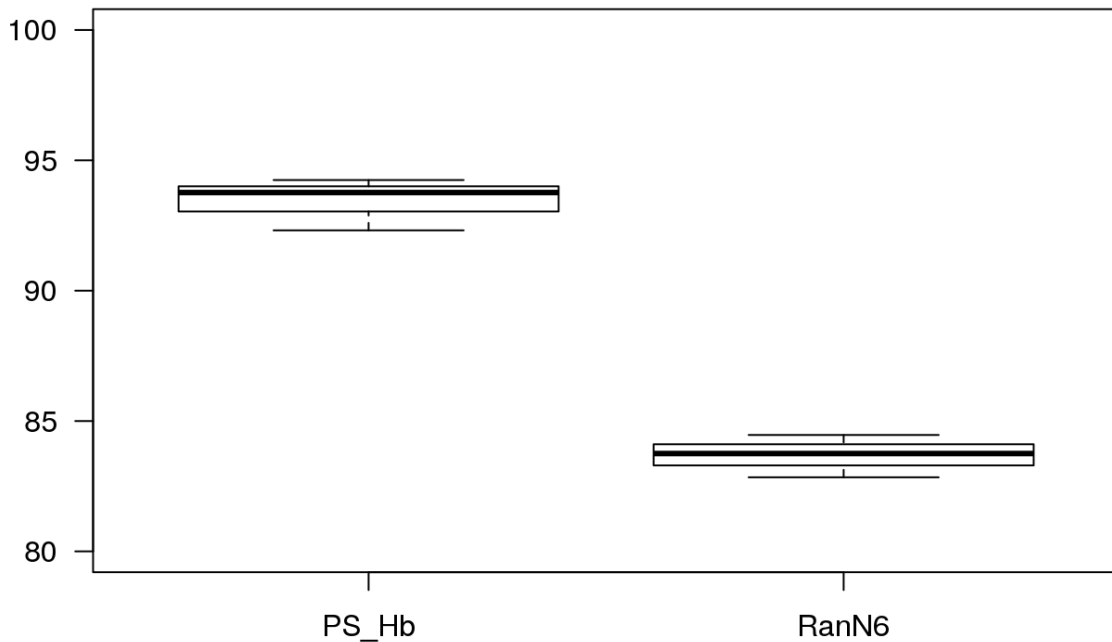

## Hierarchical annotation

Differences of sampling will not bias distort the distribution of reads between annotations, so the non-sampled library is used here.

```
annot.l2 <- read.table(paste(LIBRARY,'l2','annot',sep='.'), head=F, col.names
=c('id', 'feature'), row.names=1)
annot.l2 <- hierarchAnnot(annot.l2)

libs <- cbind(libs, t(rowsum(l2, annot.l2[, 'class'])))
```

## Gene symbols used normalisation data

```
genesymbols <- read.table(paste(LIBRARY,'l2','genes',sep='.'), col.names=c("c
luster","symbol"), stringsAsFactors=FALSE)
rownames(genesymbols) <- genesymbols$cluster

countSymbols <- function(X) length(unique(genesymbols[X > 0,'symbol']))

libs[colnames(l2.sub),"genes.sub"] <- apply(l2.sub, 2, countSymbols)
libs[colnames(l2), "genes"] <- apply(l2, 2, countSymbols)
```

```
dotsize <- mean(libs$genes.sub) /150
par(mar=c(7,10,2,30))
p <- ggplot(libs, aes(x=group, y=genes.sub)) +
  stat_summary(fun.y=mean, fun.ymin=mean, fun.ymax=mean,
  geom="crossbar", color="gray") +
  geom_dotplot(aes(fill=group), binaxis='y', binwidth=1,
  dotsize=dotsize, stackdir='center') +
  theme_bw() +
  theme(axis.text.x = element_text(size=14)) +
  theme(axis.text.y = element_text(size=14)) +
  theme(axis.title.x = element_blank())+
  theme(axis.title.y = element_text(size=14))+
  ylim(1300,1600) +
  ylab("Number of genes detected")
p + theme(legend.position="none")
```

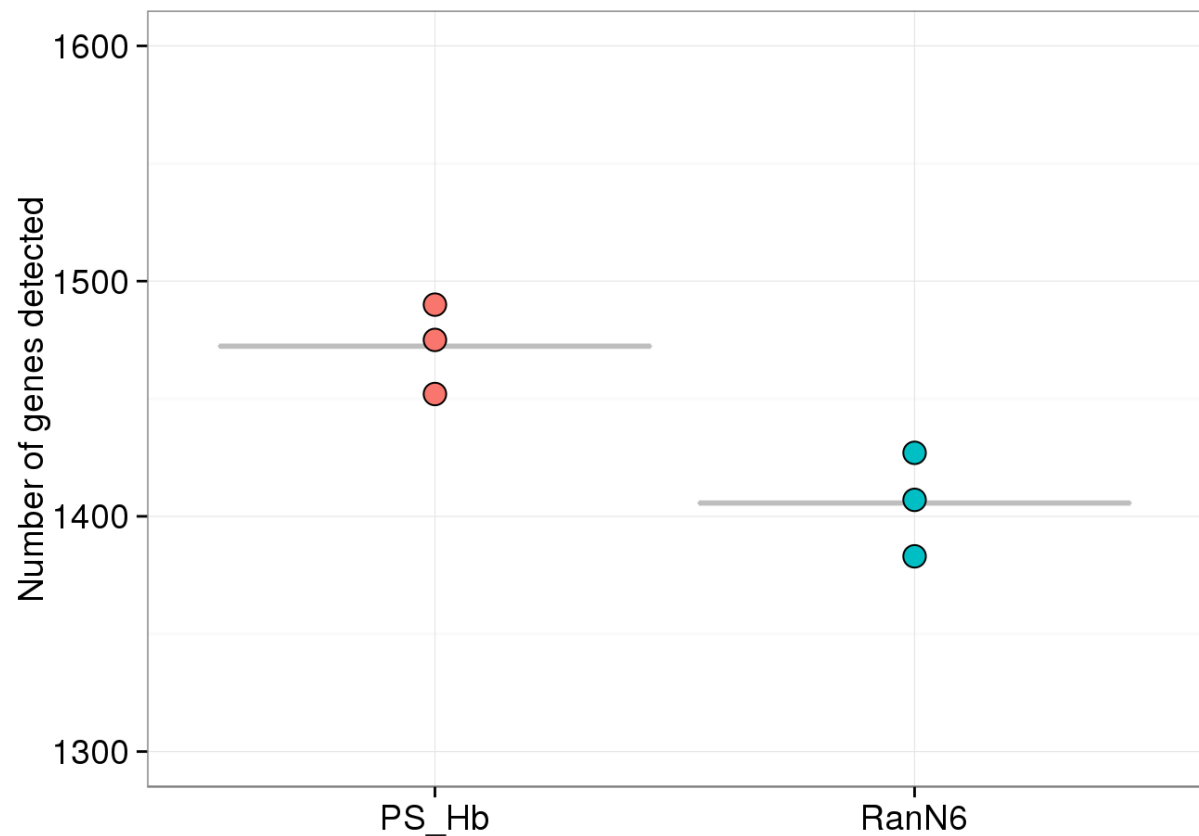

### statistical analysis of gene count (with normalized data)

```
t.test(data=libs, genes.sub ~ group)
```

```
##
## Welch Two Sample t-test
##
## data: genes.sub by group
## t = 3.9567, df = 3.923, p-value = 0.01736
## alternative hypothesis: true difference in means is not equal to 0
## 95 percent confidence interval:
## 19.52393 113.80940
## sample estimates:
## mean in group PS_Hb mean in group RanN6
## 1472.333 1405.667
```

## Analysis of the gene expressed in different sample with different primers - normalized data (l2.sub)

```
l2_to_g2 <- function(l2) {
  g2 <- rowsum(l2, genesymbols$symbol)
  subset(g2, rowSums(g2) > 0)
}

g2.sub <- l2_to_g2(l2.sub)
g2 <- l2_to_g2(l2)
G2 <- TPM(g2)

libs$genes.r <- rarefy(t(g2), 3190)[rownames(libs)]

t.test(data=libs, genes.r ~ group)
```

```
##
## Welch Two Sample t-test
##
## data: genes.r by group
## t = 2.8877, df = 3.518, p-value = 0.05212
## alternative hypothesis: true difference in means is not equal to 0
## 95 percent confidence interval:
## -1.227913 157.191500
## sample estimates:
## mean in group PS_Hb mean in group RanN6
## 1491.744 1413.763
```

```
G2mean <- function(TABLE)
  data.frame( RanN6 = TPM(rowSums(TABLE[,RanN6]))
             , PS_Hb = TPM(rowSums(TABLE[,PSHb])) )

G2.sub.mean <- G2mean(g2.sub)
G2.mean <- G2mean(g2)
```

```
head(G2.sub.mean[order(G2.sub.mean$RanN6, decreasing=TRUE),], 30)
```

| ##                       | RanN6      | PS_Hb       |
|--------------------------|------------|-------------|
| ## .                     | 108254.963 | 109090.9091 |
| ## J01415.3,J01415.4     | 96133.751  | 20271.6823  |
| ## HBB                   | 44096.134  | 940.4389    |
| ## J01415.2,J01415.24    | 33646.813  | 7836.9906   |
| ## MALAT1                | 18913.271  | 43469.1745  |
| ## HBA2                  | 18495.298  | 1253.9185   |
| ## HBA1                  | 17032.393  | 0.0000      |
| ## Metazoa_SRP           | 12539.185  | 1253.9185   |
| ## RN7SL2                | 10867.294  | 6792.0585   |
| ## Metazoa_SRP,RN7SL1    | 9195.402   | 1776.3845   |
| ## B2M                   | 7836.991   | 4702.1944   |
| ## MT-ND6                | 5538.140   | 8881.9227   |
| ## ACTB                  | 4388.715   | 626.9592    |
| ## BNIP3L                | 3657.262   | 10135.8412  |
| ## FTL                   | 3030.303   | 1776.3845   |
| ## DHFR                  | 2821.317   | 835.9457    |
| ## MT-CO1                | 2612.330   | 1880.8777   |
| ## RN7SK                 | 2403.344   | 2089.8642   |
| ## UBB                   | 2403.344   | 2821.3166   |
| ## MT-ND4                | 2298.851   | 0.0000      |
| ## RNY4                  | 2089.864   | 208.9864    |
| ## RP5-857K21.4          | 2089.864   | 1253.9185   |
| ## MYL12A                | 1985.371   | 626.9592    |
| ## SNCA                  | 1776.385   | 2507.8370   |
| ## HIST1H2BC             | 1671.891   | 835.9457    |
| ## RMRP                  | 1671.891   | 104.4932    |
| ## MT-ND1                | 1567.398   | 104.4932    |
| ## MYL6,RP11-603J24.18   | 1567.398   | 313.4796    |
| ## PTPRC                 | 1567.398   | 1044.9321   |
| ## RP11-1035H13.3,RPS15A | 1567.398   | 208.9864    |

```
head(G2.sub.mean[order(G2.sub.mean$PS_Hb, decreasing=TRUE),], 30)
```

| ##                    | RanN6       | PS_Hb      |
|-----------------------|-------------|------------|
| ## .                  | 108254.9634 | 109090.909 |
| ## MALAT1             | 18913.2706  | 43469.175  |
| ## J01415.3,J01415.4  | 96133.7513  | 20271.682  |
| ## BNIP3L             | 3657.2623   | 10135.841  |
| ## BCL2L1             | 835.9457    | 9926.855   |
| ## HEMGN              | 1044.9321   | 8986.416   |
| ## MT-ND6             | 5538.1400   | 8881.923   |
| ## HNRNPK             | 522.4660    | 8150.470   |
| ## J01415.2,J01415.24 | 33646.8130  | 7836.991   |
| ## RN7SL2             | 10867.2936  | 6792.059   |
| ## B2M                | 7836.9906   | 4702.194   |
| ## RPL5               | 417.9728    | 4702.194   |
| ## COX7C              | 104.4932    | 4597.701   |
| ## PKM                | 313.4796    | 3970.742   |
| ## RNU2-2,WDR74       | 313.4796    | 3657.262   |
| ## LCP2               | 104.4932    | 3552.769   |
| ## SNHG12,SNORD99     | 1149.4253   | 3343.783   |
| ## C9orf78            | 1044.9321   | 3239.289   |
| ## GYPC               | 522.4660    | 3239.289   |
| ## NCOA4,TIMM23B      | 731.4525    | 3239.289   |
| ## TPM3               | 1149.4253   | 3239.289   |
| ## UQCRCB             | 104.4932    | 3134.796   |
| ## HMGB1              | 522.4660    | 3030.303   |
| ## SAT1               | 940.4389    | 3030.303   |
| ## SON                | 940.4389    | 3030.303   |
| ## J01415.23          | 1253.9185   | 2925.810   |
| ## DCUN1D1            | 0.0000      | 2821.317   |
| ## UBB                | 2403.3438   | 2821.317   |
| ## RPLP0              | 1567.3981   | 2716.823   |
| ## RPS6               | 835.9457    | 2716.823   |

## Gene list on normalized data (table I2.sub)

```
RanN6_genelist.sub <- listSymbols(rownames(subset(G2.sub.mean, RanN6>0)))  
PSHb_genelist.sub <- listSymbols(rownames(subset(G2.sub.mean, PS_Hb>0)))
```

```
genelist <- listSymbols(rownames(g2))
```

```
write.table(genelist, 'NC22.genelist.txt', sep = "\t", quote = FALSE, row.names = FALSE, col.names = FALSE)
```

## Haemoglobin barplot

```
par(mar=c(2,2,2,2))
barplot(t(G2[grep('^HB[AB]', rownames(g2), value=T),]), beside=T, ylab='Normalised expression value (cpm).', col=c("gray50","gray50", "gray50", "gray90", "gray90", "gray90"))
legend("topleft", legend=c("RanN6", "PS_Hb"), fill=c("gray90", "gray50"))
```

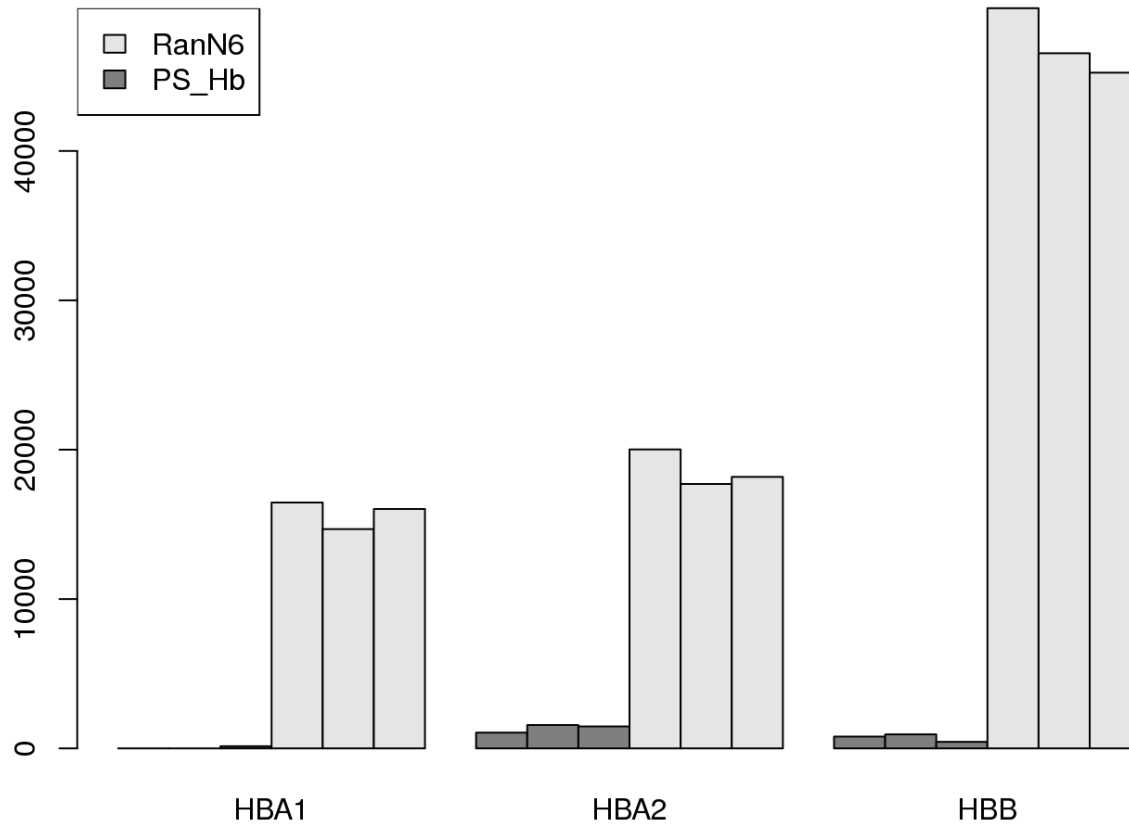



## Figure S1

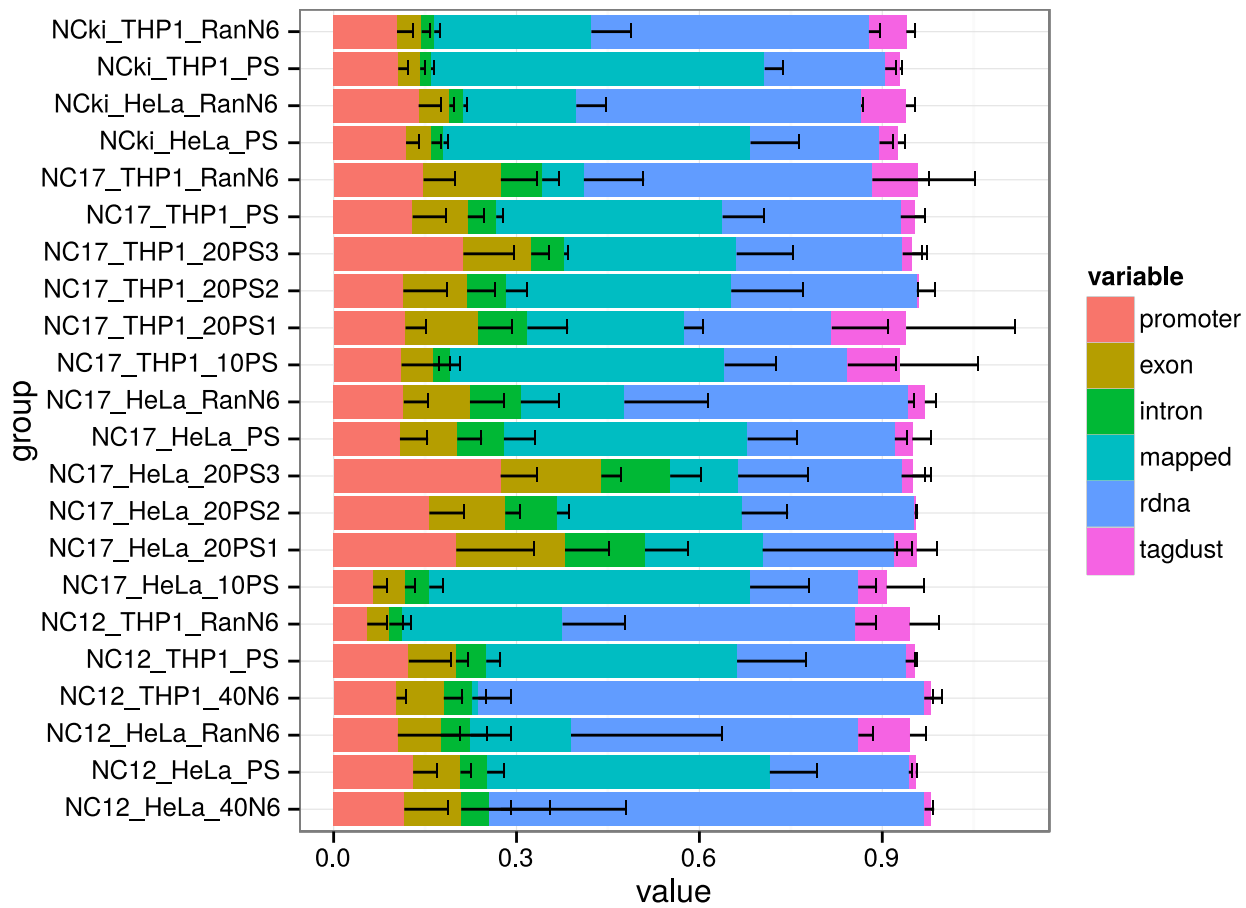

Figure S2

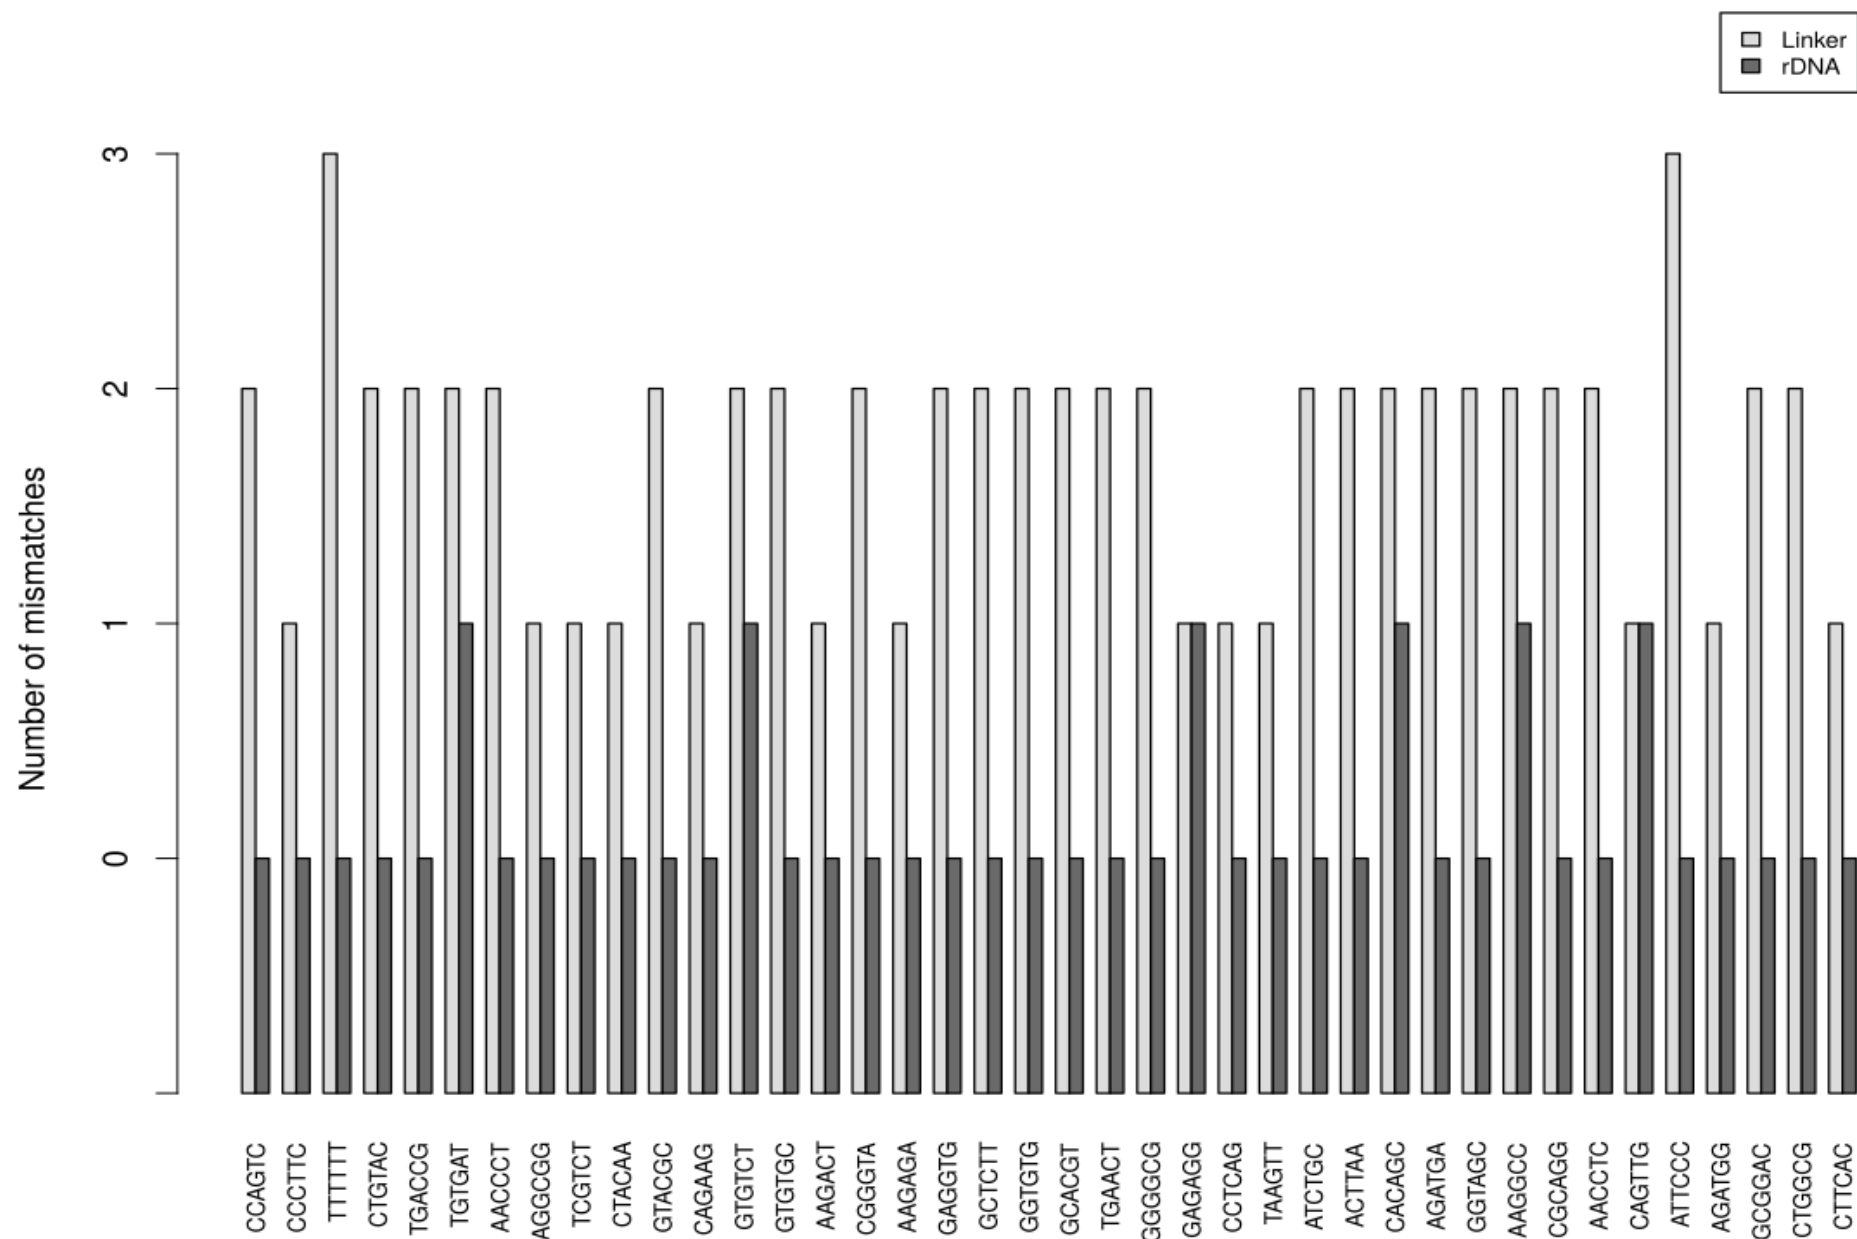

## Table S2

| 20PS set1 | 20PS set2 | 20PS set3 | 10PS   |
|-----------|-----------|-----------|--------|
| GCCAAA    | CTGGCC    | GCCAAA    | GCCAAA |
| AGCAAA    | TGTGCC    | AAACAA    | AAACAA |
| AAACAA    | ATTGCC    | TGCCAA    | TGCCAA |
| ACACAA    | CTACGC    | CACACA    | CACACA |
| TGCCAA    | TATGGC    | GTCACA    | GTCACA |
| CAAACA    | TTGTGC    | GTGGCA    | GTGGCA |
| CACACA    | ACCACG    | ATTTTA    | ATTTTA |
| TGCACA    | CACAGG    | CACAAC    | CACAAC |
| GTCACA    | ACTGTG    | AACCAC    | AACCAC |
| TAGCCA    | TGCCAT    | TACCCC    | TACCCC |
| GTGGCA    | TGGCAT    | CTGGCC    |        |
| TGTTTA    | GTGCAT    | ATTGCC    |        |
| ATTTTA    | TTGTAT    | TATGGC    |        |
| CAAAAC    | ATTTAT    | ACCACG    |        |
| CACAAC    | TTTTAT    | ACTGTG    |        |
| GCTAAC    | TGGCGT    | TGGCAT    |        |
| AACCAC    | TGTTGT    | TTGTAT    |        |
| CTACCC    | ATTTGT    | TTTTAT    |        |
| TACCCC    | TTGCTT    | TGTTGT    |        |
| CTAGCC    | TGTCTT    | TTGCTT    |        |
